# Supplementary material
Source: PubMed Central journal article supplement (PMC6865325)

## Supplementary Online Content

Piotrowicz E, Pencina MJ, Opolski G, et al. Effects of a 9-week hybrid comprehensive telerehabilitation program on long-term outcomes in patients with heart failure: a randomized clinical trial. *JAMA Cardiol*. Published online November 17, 2019. doi:10.1001/jamacardio.2019.5006

**eTable 1.** TELEREH-HF Inclusion and Exclusion Criteria

**eTable 2.** TELEREH-HF Methods – Telerehabilitation Set, Telesupervised Exercise Training, Education

**eTable 3.** TELEREH-HF Exercise Training Model

**eTable 4.** Safety of Hybrid Comprehensive Telerehabilitation

**eTable 5.** Baseline Characteristics by Sites

**eTable 6.** Days Alive and Out of Hospital

**eTable 7.** Days Alive and Out of Hospital Depending on Cardiovascular Implantable Electronic Devices

**eTable 8.** Primary Outcome Analysis – Percent Days Alive and Out of Hospital in 26 months from Randomization– by Important Baseline Characteristic

**eTable 9.** Subgroup Analyses: time-to-event Outcomes from Randomization through End of Follow-up

**eTable 10.** Subgroup Analyses: Time-to Event Outcomes from Randomization through End of Follow-up Depending on Cardiovascular Implantable Electronic Devices, Usual Care as a Reference Group

**eTable 11.** Change from Baseline to 9 weeks in Continuous Outcomes in Hybrid Comprehensive Telerehabilitation Group and Usual Care Group by Cardiovascular Implantable Electronic Devices

**eTable 12.** P value for Change from Baseline to 9 weeks in Continuous Outcomes in Hybrid Comprehensive Telerehabilitation Group versus Usual Care Group by Cardiovascular Implantable Electronic Devices

**eTable 13.** Change in Distribution of NYHA Class from Baseline to week 9th

**eFigure 1.** Kaplan-Meier Probability of All-cause Mortality-free Survival in Patients Randomized to the HCTR vs. UC groups

**eFigure 2.** Kaplan-Meier Probability of Cardiovascular Mortality-free Survival in Patients Randomized to the HCTR vs. UC groups

**eFigure 3.** Kaplan-Meier Probability of All-cause Hospitalization in Patients Randomized to the HCTR vs. UC groups

**eFigure 4.** Kaplan-Meier Probability of Cardiovascular Hospitalization in Patients Randomized to the HCTR vs. UC groups

**eFigure 5.** Kaplan-Meier Probability of Heart Failure Hospitalization in Patients Randomized to the HCTR vs. UC groups

**eFigure 6.** Kaplan-Meier Probability of All-cause Mortality or All-cause Hospitalization in Patients Randomized to the HCTR vs. UC groups

**eFigure 7.** Secondary Outcomes by Site

This supplementary material has been provided by the authors to give readers additional information about their work.

**eTable 1. TELEREH-HF Inclusion and Exclusion Criteria<sup>27</sup>**

| Inclusion Criteria                                                                                                                                                                                                                                                                                                                                                                                                                                                                                                                                                                                                                                                                                                                                                                                                                                                                                                                                                                                                                                                                                                                                                                                                                                                                                                                                                                                                                                                                                                                                                                                                                                                                                                                                                                                                                                           |
|--------------------------------------------------------------------------------------------------------------------------------------------------------------------------------------------------------------------------------------------------------------------------------------------------------------------------------------------------------------------------------------------------------------------------------------------------------------------------------------------------------------------------------------------------------------------------------------------------------------------------------------------------------------------------------------------------------------------------------------------------------------------------------------------------------------------------------------------------------------------------------------------------------------------------------------------------------------------------------------------------------------------------------------------------------------------------------------------------------------------------------------------------------------------------------------------------------------------------------------------------------------------------------------------------------------------------------------------------------------------------------------------------------------------------------------------------------------------------------------------------------------------------------------------------------------------------------------------------------------------------------------------------------------------------------------------------------------------------------------------------------------------------------------------------------------------------------------------------------------|
| Patients eligible for the trial had to meet the following criteria of randomization, i.e. patients needed to: <ul style="list-style-type: none"><li>- be of either sex with any aetiology of left ventricular systolic heart failure as defined in the ESC guidelines</li><li>- have a LVEF <math>\leq</math> 40% on echocardiography</li><li>- belong to NYHA class I, II or III</li><li>- have had a hospitalization incident within 6 months prior to randomization</li><li>- be stable clinically (a patient does not need intravenous medication or has not had therapy modified for at least 7 days)</li><li>- have no contraindications to undergo cardiopulmonary exercise test</li><li>- be able to exercise using the new model of hybrid telerehabilitation</li></ul>                                                                                                                                                                                                                                                                                                                                                                                                                                                                                                                                                                                                                                                                                                                                                                                                                                                                                                                                                                                                                                                                             |
| Exclusion Criteria                                                                                                                                                                                                                                                                                                                                                                                                                                                                                                                                                                                                                                                                                                                                                                                                                                                                                                                                                                                                                                                                                                                                                                                                                                                                                                                                                                                                                                                                                                                                                                                                                                                                                                                                                                                                                                           |
| None of the following condition may exist at randomisation: <ul style="list-style-type: none"><li>- NYHA class IV</li><li>- unstable angina</li><li>- unstable clinical status</li><li>- a history of acute coronary syndrome within the last forty days in patients with LVEF <math>\leq</math> 35%</li><li>- percutaneous angioplasty within the last 2 weeks</li><li>- coronary artery bypass grafting within the last 3 months</li><li>- initiation of CRT-P or CRT-D or ICD or PM within the last six weeks</li><li>- lack of ICD, CRT-P or CRT-D or PM therapy despite the indications for implantation according to ESC guidelines</li><li>- intracardiac thrombus</li><li>- rest heart rate <math>&gt;90</math>/min</li><li>- tachypnoe <math>&gt;20</math> breaths per minute</li><li>- symptomatic and/or exercise-induced cardiac arrhythmia or conduction disturbances</li><li>- acute myocarditis and/or pericarditis</li><li>- valvular or congenital heart disease requiring surgical treatment</li><li>- hypertrophic cardiomyopathy</li><li>- severe pulmonary disease</li><li>- uncontrolled hypertension</li><li>- anemia (hemoglobin <math>&lt;11.0</math> g/dL)</li><li>- physical disability related to severe musculoskeletal or neurological problems</li><li>- recent embolism</li><li>- thrombophlebitis</li><li>- acute or chronic inflammatory disease</li><li>- acute or chronic decompensated non-cardiac diseases (thyreotoxicosis, uncontrolled diabetes)</li><li>- active malignant neoplastic diseases with survival prognosis below 2 – 5 years</li><li>- orthotropic heart transplant in anamnesis</li><li>- presence of an implanted left ventricular assist device or biventricular assist device</li><li>- aortic aneurysm</li><li>- severe psychiatric disorder</li><li>- patient's refusal to participate</li></ul> |

ESC - European Society of Cardiology, LVEF - left ventricular ejection fraction, NYHA - New York Heart Association, CRT-P - cardiac resynchronization therapy, CRT-D - cardiac resynchronization therapy and implantable cardioverter-defibrillator, ICD - implantable cardioverter-defibrillator, PM - pacemaker

**eTable 2. TELEREH-HF Methods – Telerehabilitation Set, Telesupervised Exercise Training, Education**

|                                                                                                                                                                                                                                                                                                                                                                                                                                                                                                                                                                                                                                                                                                                                                                                                                                                                                                                                                                                                                                                                          |
|--------------------------------------------------------------------------------------------------------------------------------------------------------------------------------------------------------------------------------------------------------------------------------------------------------------------------------------------------------------------------------------------------------------------------------------------------------------------------------------------------------------------------------------------------------------------------------------------------------------------------------------------------------------------------------------------------------------------------------------------------------------------------------------------------------------------------------------------------------------------------------------------------------------------------------------------------------------------------------------------------------------------------------------------------------------------------|
| <p><b>Telerehabilitation set</b></p>                                                                                                                                                                                                                                                                                                                                                                                                                                                                                                                                                                                                                                                                                                                                                                                                                                                                                                                                                                                                                                     |
| <p>The EHO mini device was able to record ECG and transmit them via a mobile phone network to the monitoring center. An EHO mini device has training sessions preprogrammed for each patient (defined exercise duration, breaks, timing of ECG recording). The moments of automatic ECG registration were preset and coordinated with the exercise training .The planned training sessions were executed with the device indicating what needed to be done with sound (beeps) and light signals (colors emitting diodes). The timing of automatic ECG recordings corresponded to peak exercise.<sup>27</sup></p>                                                                                                                                                                                                                                                                                                                                                                                                                                                         |
| <p><b>Telesupervised exercise training</b></p>                                                                                                                                                                                                                                                                                                                                                                                                                                                                                                                                                                                                                                                                                                                                                                                                                                                                                                                                                                                                                           |
| <p>Before beginning a training session, patients answer a series of questions regarding their present condition: fatigue, dyspnea, blood pressure, body mass, and medication taken. Patients then transmitted resting ECG data to the monitoring center. Before giving permission to start the training session, the medical staff also analyzed data sent from the remote monitoring of CIEDs. If no contraindications were identified , patients were given permission to start the training session (the consent procedure).<sup>27</sup> The system was used to monitor and control the training in any place where the patient elected to exercise. If the training session was completed uneventfully, the patient would transmit the ECG recording to the monitoring center immediately after the end of every training session. The ECG were analyzed at the monitoring center, and the safety, efficacy, and accuracy of a tailored patient’s rehabilitation program were assessed. Telephone contact was also used for psychological support.<sup>27</sup></p> |
| <p><b>Education</b></p>                                                                                                                                                                                                                                                                                                                                                                                                                                                                                                                                                                                                                                                                                                                                                                                                                                                                                                                                                                                                                                                  |
| <p>Patients were taught how to self-evaluate, how to measure HR, blood pressure, body mass, how to performed exercise training, how to evaluate the level of perceived exertion according to the Borg scale and how to operate a TR set. Education also encompassed smoking cessation, lipid management, nutritional counselling, vocational and psychosocial support.<sup>27</sup></p>                                                                                                                                                                                                                                                                                                                                                                                                                                                                                                                                                                                                                                                                                  |

**eTable 3. TELEREH-HF Exercise Training Model.<sup>27</sup>**

| Type of exercise training        | Exercise prescription                                                                                                                                                                                                                                                                                                                                                                                                                                                                                                                                                                                                                                                                                                     |
|----------------------------------|---------------------------------------------------------------------------------------------------------------------------------------------------------------------------------------------------------------------------------------------------------------------------------------------------------------------------------------------------------------------------------------------------------------------------------------------------------------------------------------------------------------------------------------------------------------------------------------------------------------------------------------------------------------------------------------------------------------------------|
| Aerobic endurance training       | <p><b>Devices:</b> Nordic walking poles</p> <p><b>Training session</b> consists of:</p> <ol style="list-style-type: none"> <li>1.Warm-up: breathing and light resistance exercises using poles for Nordic walking; duration 5–10 min</li> <li>2.Interval Nordic walking training</li> </ol> <p><b>Intensity:</b><br/>40-70% of heart rate reserve,<br/>perceived exertion level—score of 11-12 on the Borg scale</p> <p><b>Duration:</b><br/>start at 10 min/session/day<sup>a</sup><br/>15 min/session/day<sup>b</sup><br/>20 min/session/day<sup>c</sup><br/>gradually increased to 30–45 min/session/day</p> <p>3.Cool down: relaxation, breathing exercise; duration 5 min</p> <p><b>Frequency:</b> 1 session/day</p> |
| Respiratory muscle training      | <p><b>Devices:</b> Train Air software - during the initial stage at the hospital<br/>Threshold Inspiratory Muscle Trainer - during the basic stage at home</p> <p><b>Intensity:</b> start at 30% of the maximal inspiratory mouth pressure (<math>PI_{max}</math>) and readjusted to a maximum of 60% (if possible)</p> <p><b>Duration:</b><br/>minimum 5-10 minutes/day<br/>maximum 20-30 minutes/day;</p> <p><b>Frequency:</b> 3-5 times/ throughout the day</p>                                                                                                                                                                                                                                                        |
| Resistance and strength training | <p><b>Devices:</b> Thera Band - yellow color</p> <p><b>Intensity:</b> 5-10 repetitions of each of the seven exercises</p> <p><b>Duration:</b> gradually increased 5-10-15 minutes/day</p> <p><b>Frequency:</b> 1 session/ day</p>                                                                                                                                                                                                                                                                                                                                                                                                                                                                                         |

Duration of aerobic endurance training depended on the functional capacity in baseline cardiopulmonary exercise test:

<sup>a</sup>baseline peak VO<sub>2</sub> below 10 mL/kg/min.

<sup>b</sup>baseline peak VO<sub>2</sub> 10–18 mL/kg/min.

<sup>c</sup>baseline peak VO<sub>2</sub> over 18 mL/kg/min.

**eTable 4. Safety of Hybrid Comprehensive Telerehabilitation**

|                                                                                  |            |
|----------------------------------------------------------------------------------|------------|
| <b>Assessment of adverse events</b>                                              |            |
| assessment of adverse events - during exercise training session                  | 6 (1.56%)  |
| assessment of adverse events - immediately after training session (up to 1 hour) | 4 (1.04%)  |
| assessment of adverse events - without connection to training session            | 34 (8.85%) |
| <b>during exercise training session</b>                                          |            |
| angina symptoms                                                                  | 0          |
| dyspnoea – tachypnoe > 20 breaths/min.                                           | 3 (0.78%)  |
| syncope                                                                          | 1 (0.26%)  |
| decrease in New York Heart Association class                                     | 0          |
| weight gain of at least 1.8 kilograms during the course of 1-3 days              | 1 (0.26%)  |
| exercise-induced hypotension                                                     | 0          |
| supraventricular tachycardia, atrial flutter/atrial fibrillation                 | 0          |
| complex ventricular arrhythmia                                                   | 1 (0.26%)  |
| second-degree and third-degree atrioventricular block                            | 0          |
| resting heart rate >100 beats per minute                                         | 1 (0.26%)  |
| signs and symptoms of heart failure                                              | 0          |
| necessity for urgent hospitalization                                             | 0          |
| death                                                                            | 0          |
| other adverse events                                                             | 1 (0.26%)  |
| <b>immediately after training session (up to 1 hour)</b>                         |            |
| angina symptoms                                                                  | 0          |
| dyspnoea – tachypnoe > 20 breaths/min                                            | 1 (0.26%)  |
| syncope                                                                          | 1 (0.26%)  |
| decrease in New York Heart Association class                                     | 0          |
| weight gain of at least 1.8 kilograms during the course of 1-3 days              | 0          |
| exercise-induced hypotension                                                     | 0          |
| supraventricular tachycardia, atrial flutter/atrial fibrillation                 | 0          |
| complex ventricular arrhythmia                                                   | 1 (0.26%)  |
| second-degree and third-degree atrioventricular block                            | 0          |
| resting heart rate >100 beats per minute                                         | 0          |
| signs and symptoms of heart failure                                              | 0          |
| necessity for urgent hospitalization                                             | 0          |
| death                                                                            | 0          |
| other adverse events                                                             | 1 (0.26%)  |
| <b>without connection to training session</b>                                    |            |
| angina                                                                           | 2 (0.52%)  |
| dyspnoea – tachypnoe > 20 breaths/min                                            | 5 (1.30%)  |
| syncope                                                                          | 1 (0.26%)  |
| decrease in New York Heart Association class                                     | 3 (0.78%)  |

|                                                                     |           |
|---------------------------------------------------------------------|-----------|
| weight gain of at least 1.8 kilograms during the course of 1-3 days | 7 (1.82%) |
| exercise-induced hypotension                                        | 0         |
| supraventricular tachycardia, atrial flutter/atrial fibrillation    | 8 (2.08%) |
| complex ventricular arrhythmia                                      | 5 (1.30%) |
| second-degree and third-degree atrioventricular block               | 0         |
| resting heart rate >100 beats per minute                            | 2 (0.52%) |
| signs and symptoms of heart failure                                 | 2 (0.52%) |
| necessity for urgent hospitalization                                | 7 (1.82)  |
| death                                                               | 0         |
| other adverse events                                                | 9 (2.34)  |



**eTable 5. Baseline Characteristics by Sites**

|                                                   | Site 1         | Site 2         | Site 3         | Site 4         | Site 5         | P                 |
|---------------------------------------------------|----------------|----------------|----------------|----------------|----------------|-------------------|
| Males. n (%)                                      | 201<br>(91.4%) | 161<br>(90.4%) | 160<br>(87.4%) | 124<br>(83.2%) | 107<br>(89.2%) | 0.1449            |
| <b>Age (years). mean ± SD</b>                     | 59.0 ±<br>10.8 | 63.0 ±<br>9.5  | 64.3 ±<br>11.6 | 64.0 ±<br>9.1  | 62.7 ±<br>10.1 | <b>&lt;0.0001</b> |
| Left Ventricular Ejection Fraction (%). mean ± SD | 30.0 ±<br>7.8  | 30.4 ±<br>7.0  | 30.5 ±<br>7.0  | 31.8 ±<br>5.7  | 30.8 ±<br>7.0  | 0.168             |
| Body Mass Index (kg/m <sup>2</sup> ). mean ± SD   | 29.4 ±<br>5.0  | 29.3 ±<br>4.6  | 28.8 ±<br>10.6 | 28.7 ±<br>4.8  | 29.0 ±<br>5.0  | 0.778             |
| Atrial fibrillation or atrial flutter. n (%)      | 32<br>(14.5%)  | 46<br>(25.8%)  | 30<br>(16.4%)  | 27<br>(18.1%)  | 24<br>(20%)    | 0.055             |
| <b>Etiology of heart failure, n (%)</b>           |                |                |                |                |                |                   |
| Ischaemic                                         | 134<br>(60.9%) | 113<br>(63.5%) | 129<br>(70.5%) | 98<br>(65.8%)  | 81<br>(67.5%)  | 0.333             |
| Non-ischaemic                                     | 86<br>(39.1%)  | 65<br>(36.5%)  | 54<br>(29.5%)  | 51<br>(34.2%)  | 39<br>(32.5%)  |                   |
| <b>Past medical history, n (%)</b>                |                |                |                |                |                |                   |
| Myocardial infarction                             | 126<br>(57.3%) | 97<br>(54.5%)  | 112<br>(61.2%) | 86<br>(57.7%)  | 72<br>(60.0%)  | 0.751             |
| Angioplasty                                       | 103<br>(46.8%) | 78<br>(43.8%)  | 89<br>(48.6%)  | 64<br>(42.9%)  | 62<br>(51.7%)  | 0.575             |
| <b>Coronary artery bypass grafting</b>            | 37<br>(16.8%)  | 19<br>(10.7%)  | 39<br>(21.3%)  | 20<br>(13.4%)  | 25<br>(20.8%)  | <b>0.038</b>      |
| Valve surgery                                     | 15<br>(6.8%)   | 14<br>(7.9%)   | 18<br>(9.8%)   | 9 (6.0%)       | 8 (6.7%)       | 0.701             |
| <b>Hypertension</b>                               | 115<br>(52.3%) | 116<br>(65.2%) | 122<br>(66.7%) | 103<br>(69.1%) | 78<br>(65.0%)  | <b>0.0050</b>     |
| <b>Stroke</b>                                     | 8 (3.6%)       | 9 (5.1%)       | 25<br>(13.7%)  | 11<br>(7.4%)   | 8 (6.7%)       | <b>0.0020</b>     |
| <b>Diabetes</b>                                   | 70<br>(31.8%)  | 65<br>(36.5%)  | 46<br>(25.1%)  | 60<br>(40.3%)  | 50<br>(41.7%)  | <b>0.0110</b>     |
| Chronic kidney disease                            | 36<br>(16.4%)  | 27<br>(15.2%)  | 28<br>(15.3%)  | 27<br>(18.1%)  | 31<br>(25.8%)  | 0.122/0.049       |
| <b>Hyperlipidemia</b>                             | 111<br>(50.5%) | 86<br>(48.3%)  | 68<br>(37.2%)  | 80<br>(53.7%)  | 51<br>(42.5%)  | <b>0.018</b>      |
| <b>Functional status, n (%)</b>                   |                |                |                |                |                |                   |
| <b>NYHA I n (%)</b>                               | 26<br>(11.8%)  | 24<br>(13.5%)  | 40<br>(21.9%)  | 12<br>(8.0%)   | 2 (1.7%)       | <b>&lt;0.0001</b> |
| <b>NYHA II n (%)</b>                              | 164<br>(74.6%) | 115<br>(64.6%) | 119<br>(65.0%) | 91<br>(61.1%)  | 88<br>(73.3%)  |                   |
| <b>NYHA III n (%)</b>                             | 30<br>(13.6%)  | 39<br>(21.9%)  | 24<br>(13.1%)  | 46<br>(30.9%)  | 30<br>(25.0%)  |                   |
| <b>Treatment, n (%)</b>                           |                |                |                |                |                |                   |
| Beta-blocker                                      | 215<br>(97.7%) | 176<br>(98.9%) | 175<br>(95.6%) | 141<br>(94.6%) | 118<br>(98.3%) | 0.113             |
| <b>ACEI/ARB</b>                                   | 213<br>(96.8%) | 170<br>(95.5%) | 160<br>(87.4%) | 136<br>(91.3%) | 114<br>(95.0%) | <b>0.002</b>      |

|                                               |                |                |                |                |                |                    |
|-----------------------------------------------|----------------|----------------|----------------|----------------|----------------|--------------------|
| Digoxin                                       | 30<br>(13.6%)  | 29<br>(16.3%)  | 15<br>(8.2%)   | 20<br>(13.4%)  | 10<br>(8.3%)   | 0.099              |
| Loop diuretics                                | 173<br>(78.6%) | 131<br>(73.6%) | 143<br>(78.1%) | 106<br>(71.1%) | 97<br>(80.8%)  | 0.258              |
| <b>Spirolactone/eplerenone</b>                | 190<br>(86.4%) | 163<br>(91.6%) | 125<br>(68.3%) | 118<br>(79.2%) | 103<br>(85.8%) | <b>&lt;0.0001</b>  |
| <b>Aspirin/clopidogrel</b>                    | 123<br>(55.9%) | 85<br>(47.7%)  | 108<br>(59.0%) | 103<br>(69.1%) | 66<br>(55%)    | <b>0.003</b>       |
| <b>Anticoagulants</b>                         | 80<br>(36.4%)  | 65<br>(36.5%)  | 63<br>(34.4%)  | 25<br>(16.8%)  | 20<br>(16.7%)  | <b>&lt;0.0001</b>  |
| <b>NOAC</b>                                   | 25<br>(11.4%)  | 22<br>(12.4%)  | 31<br>(16.9%)  | 27<br>(18.1%)  | 28<br>(23.3%)  | <b>0.029</b>       |
| Statins                                       | 179<br>(81.4%) | 146<br>(82.0%) | 142<br>(77.6%) | 129<br>(86.6%) | 100<br>(83.3%) | 0.320              |
| CIEDs                                         | 183<br>(83.2%) | 157<br>(88.2%) | 131<br>(71.6%) | 105<br>(70.5%) | 106<br>(88.3%) | <b>&lt;0.0001</b>  |
| <b>Implantable cardioverter-defibrillator</b> | 122<br>(66.7%) | 78<br>(49.7%)  | 90<br>(68.7%)  | 69<br>(65.7%)  | 72<br>(67.9%)  | <b>0.002</b>       |
| <b>CRT-P</b>                                  | 2<br>(1.1%)    | 3<br>(1.9%)    | 1<br>(0.8%)    | 1<br>(0.9%)    | 1<br>(0.9%)    |                    |
| <b>CRT-D</b>                                  | 58<br>(31.7%)  | 75<br>(47.8%)  | 35<br>(26.7%)  | 35<br>(33.3%)  | 33<br>(31.1%)  |                    |
| <b>Remote monitoring CIEDs</b>                | 80<br>(43.7%)  | 119<br>(75.8%) | 33<br>(25.3%)  | 0<br>(0%)      | 43<br>(40.6%)  | <b>p&lt;0,0001</b> |

SD, Standard Deviation; NYHA, New York Heart Association class; ACEI angiotensin converting enzyme inhibitors, ARB angiotensin receptor blockers, CIEDs cardiovascular implantable electronic devices, NOAC non vitamin K antagonist oral anticoagulants, CRT-P cardiac resynchronization therapy, CRT-D cardiac resynchronization therapy and cardioverter-defibrillator.

**eTable 6. Days Alive and Out of Hospital**

|                                             | HCTR group | UC group |
|---------------------------------------------|------------|----------|
| Mean number of days of follow-up            | 715.8      | 726.3    |
| Median number of days of follow-up          | 793.0      | 793.0    |
| Mean number of days alive out of hospital   | 700.9      | 711.5    |
| Median number of days alive out of hospital | 775.0      | 776.0    |
| Mean %DAOH                                  | 91.9       | 92.8     |
| Median %DAOH                                | 99.6       | 99.6     |

DAOH - Days alive and out of hospital; HCTR-hybrid comprehensive telerehabilitation; UC-usual care

**eTable 7. Days Alive and Out of Hospital Depending on Cardiovascular Implantable Electronic Devices**

|              | HCTR group          |                       |                | UC group            |                       |                | p <sub>3</sub> -value HCTR vs UC |               |
|--------------|---------------------|-----------------------|----------------|---------------------|-----------------------|----------------|----------------------------------|---------------|
|              | With CIEDs<br>N=335 | Without CIEDs<br>N=90 | p <sub>1</sub> | With CIEDs<br>N=347 | Without CIEDs<br>N=78 | p <sub>2</sub> | With CIEDs                       | Without CIEDs |
| Mean %DAOH   | 91.6                | 92.8                  | 0.007          | 91.7                | 98.1                  | 0.006          | 0.706                            | 0.966         |
| Median %DAOH | 99.4                | 100.0                 |                | 99.5                | 99.9                  |                |                                  |               |

HCTR - hybrid comprehensive telerehabilitation; UC - usual care; CIEDs - cardiovascular implantable electronic devices; DAOH – days alive and out of hospital; p<sub>1</sub>, p<sub>2</sub>-value – significance level for within group differences; p<sub>3</sub>-value – significance level for between group differences

**eTable 8. Primary Outcome Analysis – Percent Days Alive and Out of Hospital in 26 months from Randomization– by Important Baseline Characteristic**

| All-cause hospitalization    | P (DAOH <sub>HCTR</sub> >DAOH <sub>UC</sub> ) | P <sub>1</sub> - value for heterogeneity |
|------------------------------|-----------------------------------------------|------------------------------------------|
| Age > median                 | 0.517 [0.463 - 0.572]                         | 0.770                                    |
| Age ≤ median                 | 0.494 [0.442 - 0.546]                         |                                          |
| Women                        | 0.419 [0.309 - 0.530]                         | 0.739                                    |
| Men                          | 0.503 [0.463 - 0.543]                         |                                          |
| NYHA I or II                 | 0.517 [0.475 - 0.558]                         | 0.557                                    |
| NYHA III or IV               | 0.489 [0.401-0.577]                           |                                          |
| peakVO <sub>2</sub> > median | 0.521 [0.469 - 0.573]                         | 0.572                                    |
| peakVO <sub>2</sub> ≤ median | 0.499 [0.445 - 0.553]                         |                                          |
| Site 1                       | 0.523 [0.449 – 0.598]                         | 0.768                                    |
| Site 2                       | 0.460 [0.376 – 0.543]                         |                                          |
| Site 3                       | 0.582 [0.500 – 0.665]                         |                                          |
| Site 4                       | 0.475 [0.389 – 0.561]                         |                                          |
| Site 5                       | 0.382 [0.291 – 0.474]                         |                                          |
| With CIEDs                   | 0.492 [0.450 - 0.534]                         | 0.747                                    |
| Without CIEDs                | 0.502 [0.421 - 0.583]                         |                                          |

DAOH-days alive and out of hospital, HCTR-hybrid cardiac telerehabilitation; UC-usual care; NYHA – New York Heart Association; peak VO<sub>2</sub> – peak oxygen consumption; P (DAOH<sub>HCTR</sub> >DAOH<sub>UC</sub>) - probability that HCTR extends %DAOH vs. usual care; P<sub>1</sub> – value – assessment of heterogeneity of treatment in stratum

**eTable 9. Subgroup Analyses: time-to-event Outcomes from Randomization through End of Follow-up**

| Outcome                       | HCTR group<br>N=425 |                             | UC group<br>N=425 |                             | Hazard ratio<br>95% Wald CL | P-value for<br>heterogeneity |
|-------------------------------|---------------------|-----------------------------|-------------------|-----------------------------|-----------------------------|------------------------------|
|                               | N (%)               | Event rate<br>at<br>26month | N (%)             | Event rate<br>at<br>26month |                             |                              |
| All-cause mortality           |                     |                             |                   |                             |                             |                              |
| Age > median                  | 33 (15.5)           | 15.8                        | 30 (15.0)         | 14.7                        | 1.032<br>[0.629, 1.692]     | 0.898                        |
| Age ≤ median                  | 21 (9.9)            | 9.1                         | 22 (9.8)          | 10.4                        | 0.981<br>[0.535-1.80]       |                              |
| Women                         | 7 (14.6)            | 14.6                        | 3 (6.1)           | 6.4                         | 2.48<br>[0.642, 9.607]      | 0.174                        |
| Men                           | 47 (12.5)           | 12.2                        | 49 (13.0)         | 13.2                        | 0.942<br>[0.630, 1.408]     |                              |
| NYHA I or II                  | 36 (10.4)           | 10.3                        | 31 (9.3)          | 9.3                         | 1.097<br>[0.676, 1.779]     | 0.854                        |
| NYHA III                      | 18 (23.1)           | 22.4                        | 21 (23.1)         | 24.3                        | 1.023<br>[0.545,1.921]      |                              |
| peak VO <sub>2</sub> > median | 14 (6.6)            | 6.6                         | 11 (5.5)          | 5.5                         | 1.222<br>[0.555, 2.693]     | 0.677                        |
| peak VO <sub>2</sub> ≤ median | 39 (18.6)           | 18.1                        | 40 (18.2)         | 18.6                        | 1.008<br>[0.647, 1.572]     |                              |
| All-cause hospitalization     |                     |                             |                   |                             |                             |                              |
| Age > median                  | 128 (60.1)          | 63.7                        | 119 (59.5)        | 63.5                        | 0.986<br>[0.768;1.266]      | 0.540                        |
| Age ≤ median                  | 104 (49.1)          | 52.3                        | 126 (56.0)        | 58.0                        | 0.884<br>[0.682; 1.147]     |                              |
| Women                         | 29 (60.4)           | 64.9                        | 26 (53.1)         | 56.5                        | 1.300<br>[0.766-2.209]      | 0.198                        |
| Men                           | 203 (58.8)          | 57.2                        | 219 (58.2)        | 61.0                        | 0.902<br>[0.745 – 1.092]    |                              |
| NYHA I or II                  | 181 (52.2)          | 54.4                        | 179 (53.6)        | 56.4                        | 0.973<br>[0.792 -1.197]     | 0.759                        |
| NYHA III                      | 51 (65.4)           | 76.2                        | 66 (72.5)         | 76.2                        | 0.917<br>[0.637 -1.322]     |                              |
| peak VO <sub>2</sub> > median | 98 (46.2)           | 48.2                        | 95 (47.3)         | 49.1                        | 0.963<br>[0.726-1.278]      | 0.932                        |
| peak VO <sub>2</sub> ≤ median | 133 (63.3)          | 68.1                        | 148 (67.3)        | 70.8                        | 0.955<br>[0.756;1.207]      |                              |

HCTR- hybrid comprehensive telerehabilitation; UC – usual care; NYHA – New York Heart Association; peak VO<sub>2</sub> – peak oxygen consumption

**eTable 10. Subgroup Analyses: Time-to Event Outcomes from Randomization through End of Follow-up Depending on Cardiovascular Implantable Electronic Devices, Usual Care as a Reference Group**

| Outcome                                                   | With CIEDs                  |       | Without CIEDs               |       |
|-----------------------------------------------------------|-----------------------------|-------|-----------------------------|-------|
|                                                           | Hazard ratio<br>95% Wald CL | P     | Hazard ratio<br>95% Wald CL | P     |
| All-cause mortality                                       | 0.91<br>[0.60-1.37]         | 0.643 | 3.04<br>[0.84-11.0]         | 0.075 |
| Cardiovascular mortality                                  | 0.85<br>[0.52-1.40]         | 0.527 | 3.22<br>[0.67-15.49]        | 0.123 |
| All-cause hospitalization                                 | 0.98<br>[0.80 – 1.19]       | 0.826 | 0.83<br>[0.52 – 1.30]       | 0.413 |
| Cardiovascular hospitalization                            | 0.93<br>[0.73 – 1.18]       | 0.550 | 0.59<br>[0.31 – 1.12]       | 0.106 |
| Heart failure hospitalization                             | 0.97<br>[0.72 – 1.30]       | 0.832 | 1.42<br>[0.66 – 3.03]       | 0.364 |
| All-cause mortality or all-cause hospitalization          | 1.00<br>[0.83 – 1.22]       | 0.967 | 0.85<br>[0.55 – 1.32]       | 0.470 |
| All-cause mortality or cardiovascular hospitalization     | 0.95<br>[0.76 – 1.18]       | 0.651 | 0.85<br>[0.49 – 1.46]       | 0.556 |
| All-cause mortality or heart failure hospitalization      | 1.03<br>[0.79 – 1.34]       | 0.807 | 1.55<br>[0.78 – 3.08]       | 0.206 |
| Cardiovascular mortality or heart failure hospitalization | 1.03<br>[0.78 – 1.36]       | 0.810 | 1.45<br>[0.71 – 3.00]       | 0.307 |

CIEDs - cardiovascular implantable electronic devices

**eTable 11. Change from Baseline to 9 weeks in Continuous Outcomes in Hybrid Comprehensive Telerehabilitation Group and Usual Care Group by Cardiovascular Implantable Electronic Devices**

| Parameter                                            | With CIEDs    |                      |                |                   | Without CIEDs  |                      |                 |                   | p <sup>3</sup> |
|------------------------------------------------------|---------------|----------------------|----------------|-------------------|----------------|----------------------|-----------------|-------------------|----------------|
|                                                      | Baseline      | 9 <sup>th</sup> week | Difference     | p <sup>1</sup>    | Baseline       | 9 <sup>th</sup> week | Difference      | p <sup>2</sup>    |                |
| <b>Hybrid Comprehensive Telerehabilitation Group</b> |               |                      |                |                   |                |                      |                 |                   |                |
| <b>Cardiopulmonary exercise test time (s)</b>        | 371<br>±170   | 414<br>±179          | +43.6<br>±83.3 | <b>&lt;0.0001</b> | 430<br>±220    | 478<br>±221          | +48.5<br>±97.7  | <b>&lt;0.0001</b> | 0.668          |
| <b>peak VO<sub>2</sub> (ml/kg/min)</b>               | 16.3<br>± 5.6 | 17.3<br>± 5.8        | 0.95<br>± 3.00 | <b>&lt;0.0001</b> | 19.2<br>± 6.91 | 20.2<br>±7.04        | 1.00<br>± 3.99  | <b>0.022</b>      | 0.904          |
| <b>% predicted peak VO<sub>2</sub></b>               | 53.2<br>±18.3 | 56.1<br>±19.0        | +2.88<br>±11.6 | <b>&lt;0.0001</b> | 66.0<br>±24.5  | 69.5<br>±24.7        | 3.5<br>±15.0    | <b>0.031</b>      | 0.673          |
| <b>Distance in six-minute walking test (m)</b>       | 413<br>±96    | 444<br>±102          | +31.1<br>±56.7 | <b>&lt;0.0001</b> | 442<br>±112    | 472<br>±131          | +29.6<br>±57.5  | <b>&lt;0.0001</b> | 0.845          |
| <b>RER</b>                                           | 0.96<br>±0.14 | 0.98<br>±0.12        | 0.02<br>±0.13  | <b>0.003</b>      | 0.97<br>±0.15  | 1.00<br>±0.12        | 0.03<br>±0.12   | <b>0.027</b>      | 0.665          |
| <b>SF-36 (score)</b>                                 | 88.9<br>±12.3 | 90.8<br>±12.6        | 1.9<br>±9.1    | <b>0.0001</b>     | 92.9<br>±13.1  | 92.7<br>±13.5        | -0.15<br>±12.0  | 0.910             | 0.135          |
| <b>Usual Care Group</b>                              |               |                      |                |                   |                |                      |                 |                   |                |
| <b>Cardiopulmonary exercise test time (s)</b>        | 361<br>±179   | 377<br>±176          | 15.5<br>±84.2  | <b>0.0007</b>     | 427<br>±201    | 449<br>±201          | +21.8<br>±91.6  | <b>0.039</b>      | 0.553          |
| <b>peak VO<sub>2</sub> (ml/kg/min)</b>               | 16.1<br>± 5.7 | 16.2<br>± 5.7        | 0.09<br>± 3.23 | 0.587             | 18.7<br>± 7.0  | 18.6<br>±6.53        | -0.14<br>± 4.09 | 0.755             | 0.630          |
| <b>% predicted peak VO<sub>2</sub></b>               | 52.8<br>±19.7 | 52.2<br>±20.0        | -0.61<br>±11.4 | 0.321             | 61.1<br>±25.4  | 61.3<br>±25.3        | 0.18<br>±13.6   | 0.907             | 0.664          |
| <b>Distance in six-minute walking test (m)</b>       | 405<br>±101   | 425<br>±107          | +20.2<br>±54.3 | <b>&lt;0.0001</b> | 428<br>±91.4   | 459<br>±103          | +31.3<br>±45.9  | <b>&lt;0.0001</b> | 0.095          |
| <b>RER</b>                                           | 0.97<br>±0.13 | 0.97<br>±0.13        | 0.00<br>±0.13  | 0.956             | 0.98<br>±0.12  | 0.99<br>±0.12        | 0.01<br>±0.12   | 0.532             | 0.625          |
| <b>SF-36 (score)</b>                                 | 88.3<br>±13.8 | 88.2<br>±14.19       | -0.09<br>±8.5  | 0.847             | 90.9<br>±15.1  | 91.9<br>±15.3        | 0.98<br>±7.6    | 0.280             | 0.315          |

CIEDs - cardiovascular implantable electronic devices; peak VO<sub>2</sub> – peak oxygen consumption; RER - respiratory exchange ratio; SF-36 Medical Outcome Survey Short Form 36 questionnaire; Data presented are mean values ± standard deviation; p<sub>1</sub>, p<sub>2</sub>-value – significance level for within group differences (deltas) in improvement of outcomes; p<sub>3</sub>-value – significance level for between group differences (deltas) in improvement of outcomes,

**eTable 12. P value for Change from Baseline to 9 weeks in Continuous Outcomes in Hybrid Comprehensive Telerehabilitation Group versus Usual Care Group by Cardiovascular Implantable Electronic Devices**

|                                         | P for $\Delta$ between HCTR and UC |                   |                     |       |
|-----------------------------------------|------------------------------------|-------------------|---------------------|-------|
|                                         | With CIEDs                         |                   | Without CIEDs       |       |
|                                         | Difference                         | p                 | Difference          | p     |
| Cardiopulmonary exercise test time (s)  | <b>28.1 ± 83.7</b>                 | <b>&lt;0.0001</b> | 26.7 ± <b>94.9</b>  | 0.073 |
| peak VO <sub>2</sub> (ml/kg/min)        | <b>0.85 ± 3.1</b>                  | <b>0.0004</b>     | 1.14 ± <b>4.04</b>  | 0.071 |
| % predicted peak VO <sub>2</sub>        | <b>3.49 ± 11.5</b>                 | <b>&lt;0.0001</b> | 3.32 ± <b>14.4</b>  | 0.138 |
| Distance in six-minute walking test (m) | <b>10.9 ± 55.5</b>                 | <b>0.011</b>      | - 1.8 ± <b>58.4</b> | 0.841 |
| RER                                     | <b>0.02 ± 0.13</b>                 | <b>0.035</b>      | 0.02 ± <b>0.12</b>  | 0.271 |
| SF-36 (score)                           | <b>2.0 ± 8.8</b>                   | <b>0.003</b>      | -1.13 ± <b>1.03</b> | 0.487 |

HCTR - hybrid comprehensive telerehabilitation; UC - usual care; CIEDs - cardiovascular implantable electronic devices; peak VO<sub>2</sub> – peak oxygen consumption; RER - respiratory exchange ratio; SF-36 Medical Outcome Survey Short Form 36 questionnaire; Data presented are mean values ± standard deviation; p-value – significance level

**eTable 13. Change in Distribution of NYHA Class from Baseline to week 9th**

|     | HCTR        |             | UC          |             |
|-----|-------------|-------------|-------------|-------------|
|     | baseline    | 9th week    | baseline    | 9th week    |
| I   | 54 (12.7%)  | 102 (24.0%) | 50 (11.8%)  | 61 (14.35%) |
| II  | 293 (68.9%) | 255 (60.0%) | 284 (66.8%) | 267 (62.8%) |
| III | 78 (18.4%)  | 68 (16.0%)  | 91 (21.4%)  | 95 (22.35%) |
| IV  | 0 (0.0%)    | 0 (0.0%)    | 0 (0.0%)    | 2 (0.5%)    |

HCTR- hybrid comprehensive telerehabilitation; UC – usual care; NYHA – New York Heart Association



**eFigure 1. Kaplan-Meier Probability of All-cause Mortality-free Survival in Patients Randomized to the HCTR vs. UC groups**

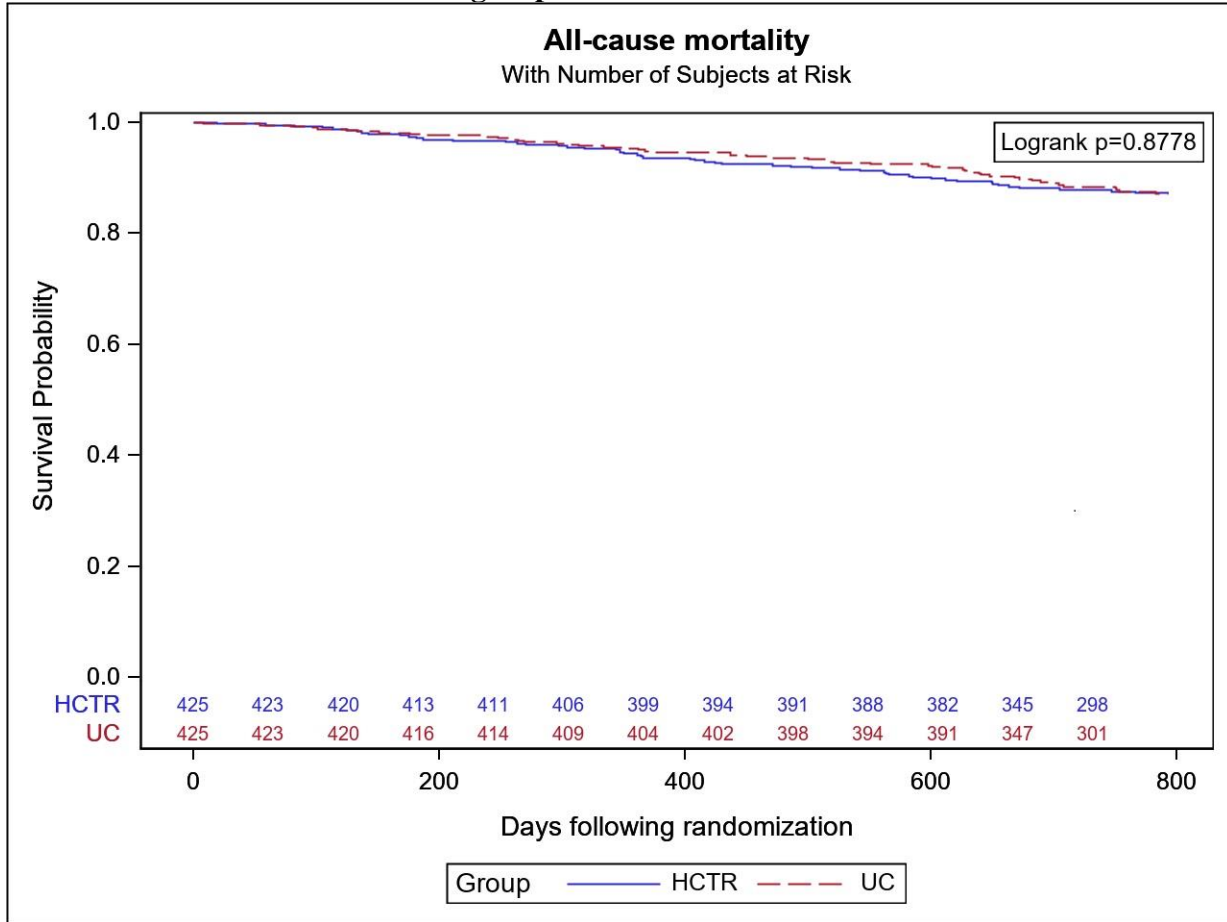

HCTR- hybrid comprehensive telerehabilitation; UC – usual care

**eFigure 2. Kaplan-Meier Probability of Cardiovascular Mortality-free Survival in Patients Randomized to the HCTR vs. UC groups**

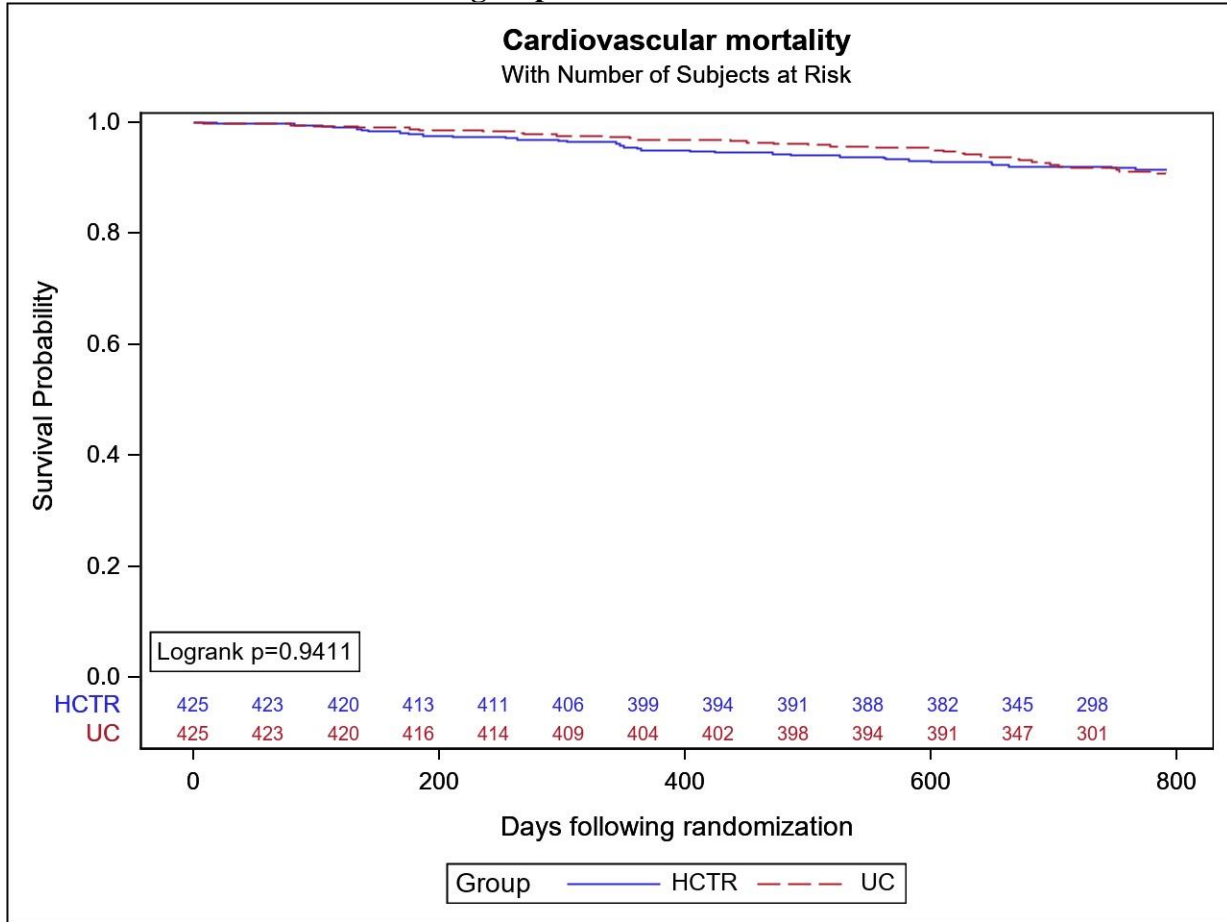

HCTR- hybrid comprehensive telerehabilitation; UC – usual care

**eFigure 3. Kaplan-Meier Probability of All-cause Hospitalization in Patients Randomized to the HCTR vs. UC groups**

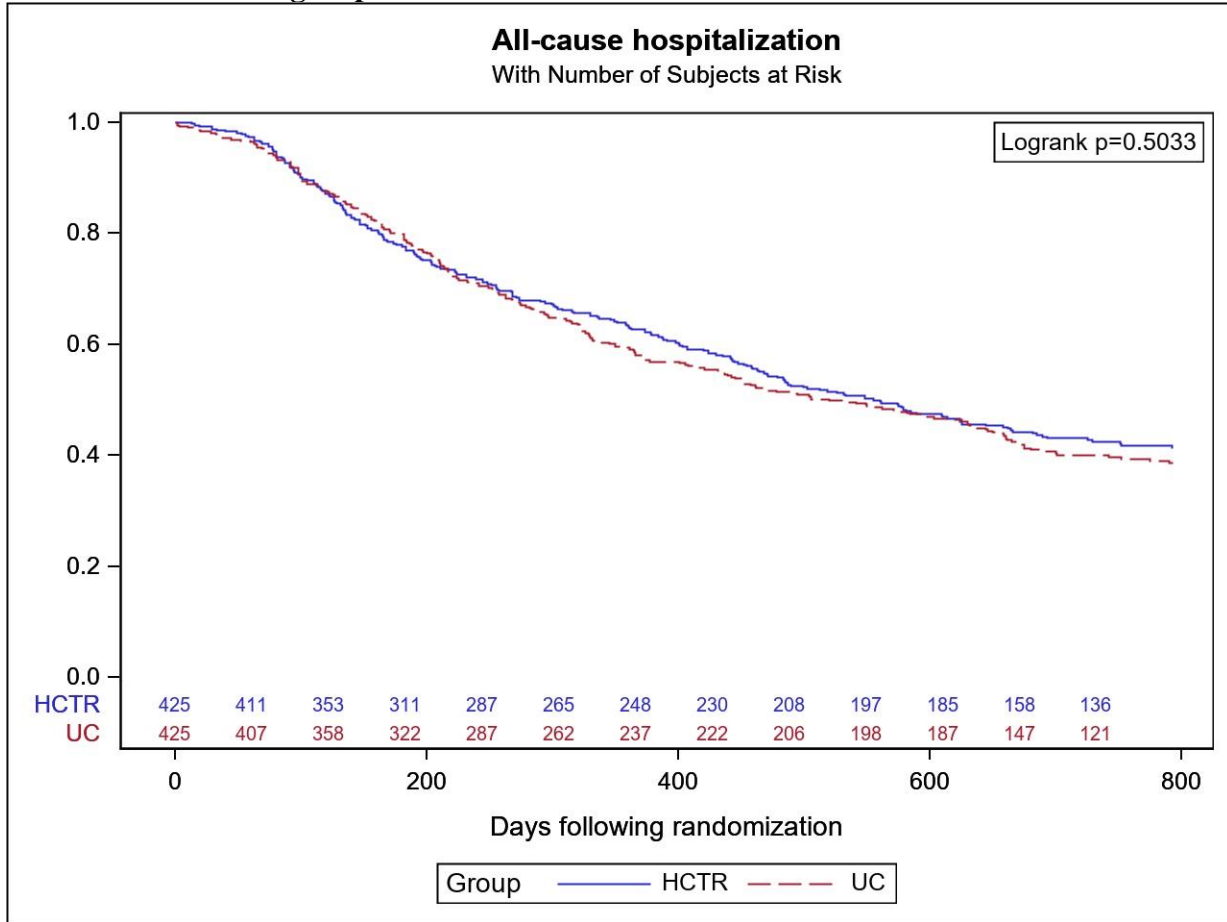

HCTR- hybrid comprehensive telerehabilitation; UC – usual care

**eFigure 4. Kaplan-Meier Probability of Cardiovascular Hospitalization in Patients Randomized to the HCTR vs. UC groups**

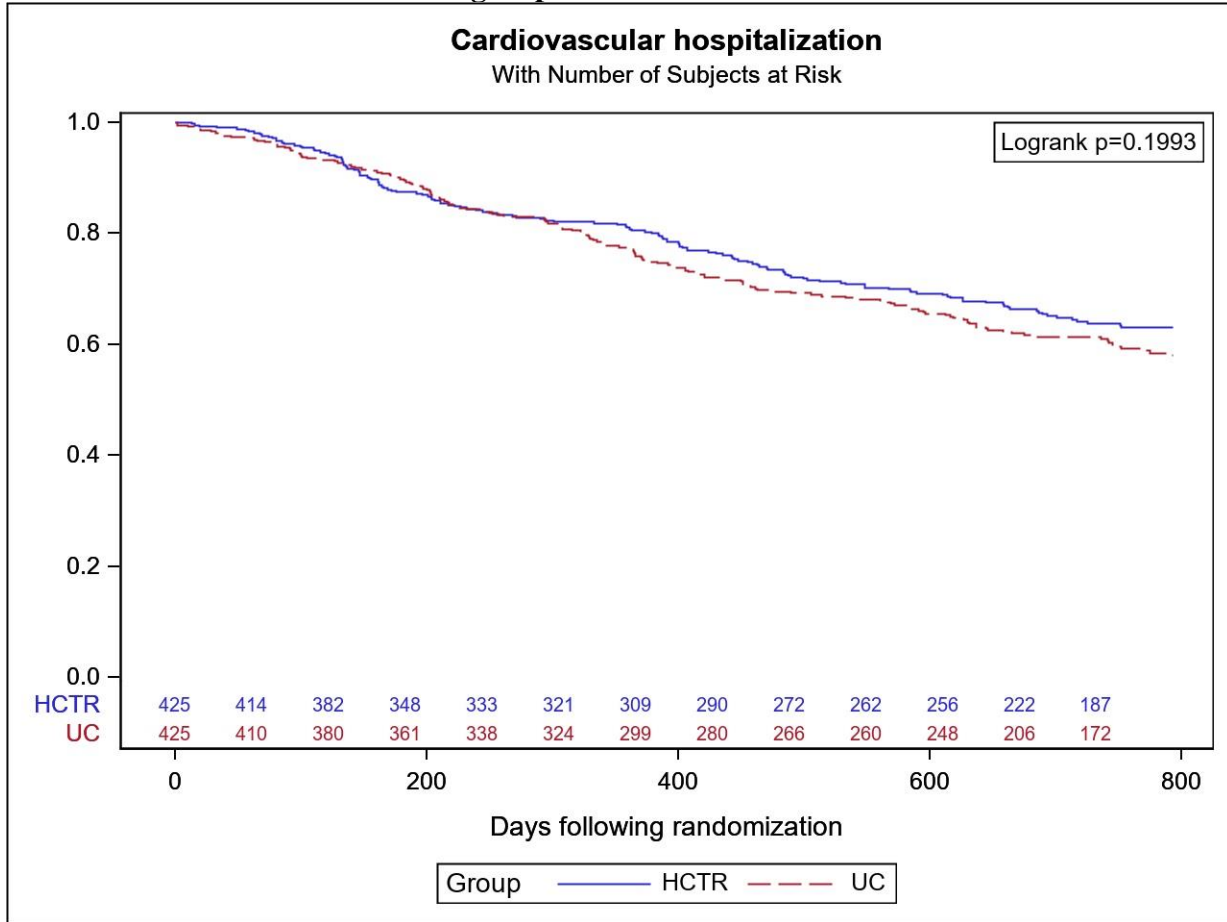

HCTR- hybrid comprehensive telerehabilitation; UC – usual care

**eFigure 5. Kaplan-Meier Probability of Heart Failure Hospitalization in Patients Randomized to the HCTR vs. UC groups**

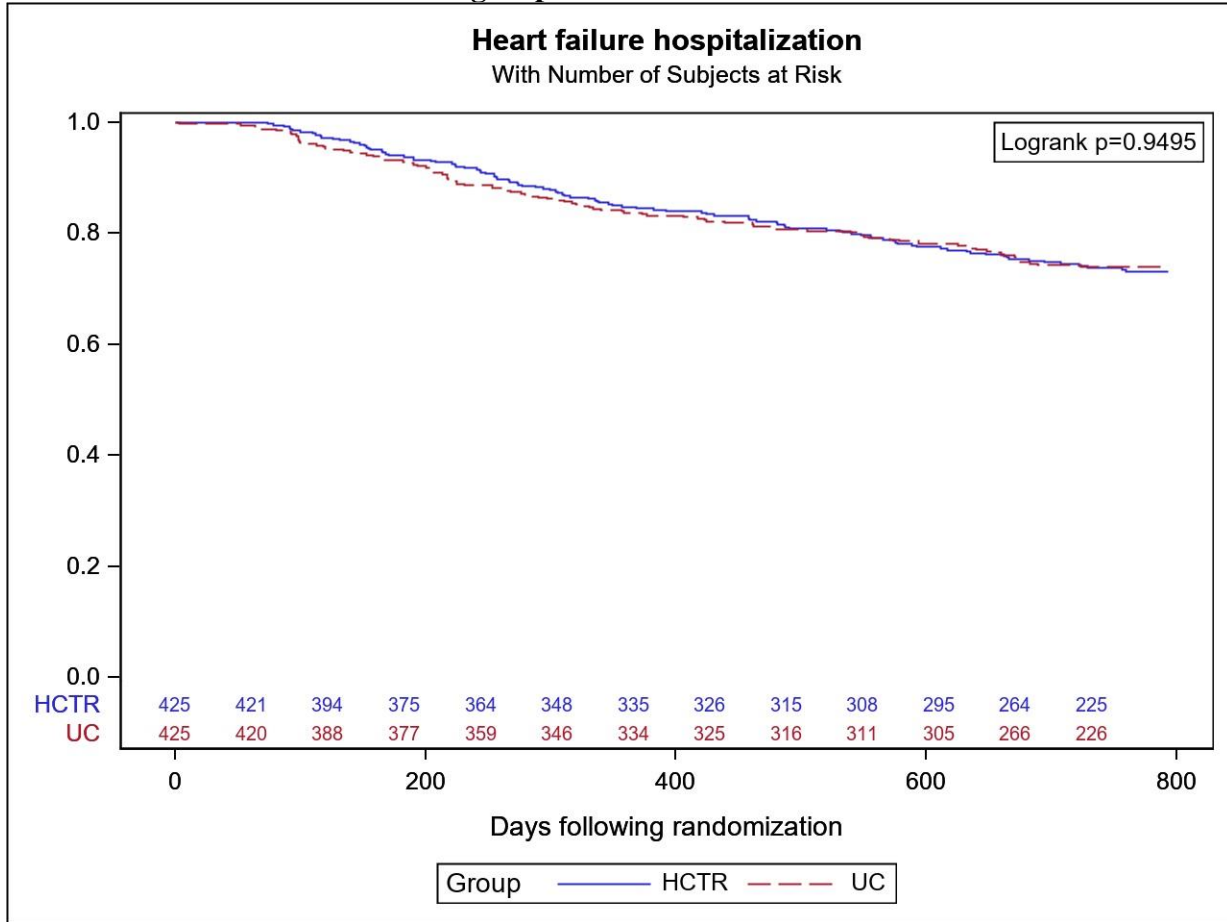

HCTR- hybrid comprehensive telerehabilitation; UC – usual care

**eFigure 6. Kaplan-Meier Probability of All-cause Mortality or All-cause Hospitalization in Patients Randomized to the HCTR vs. UC groups**

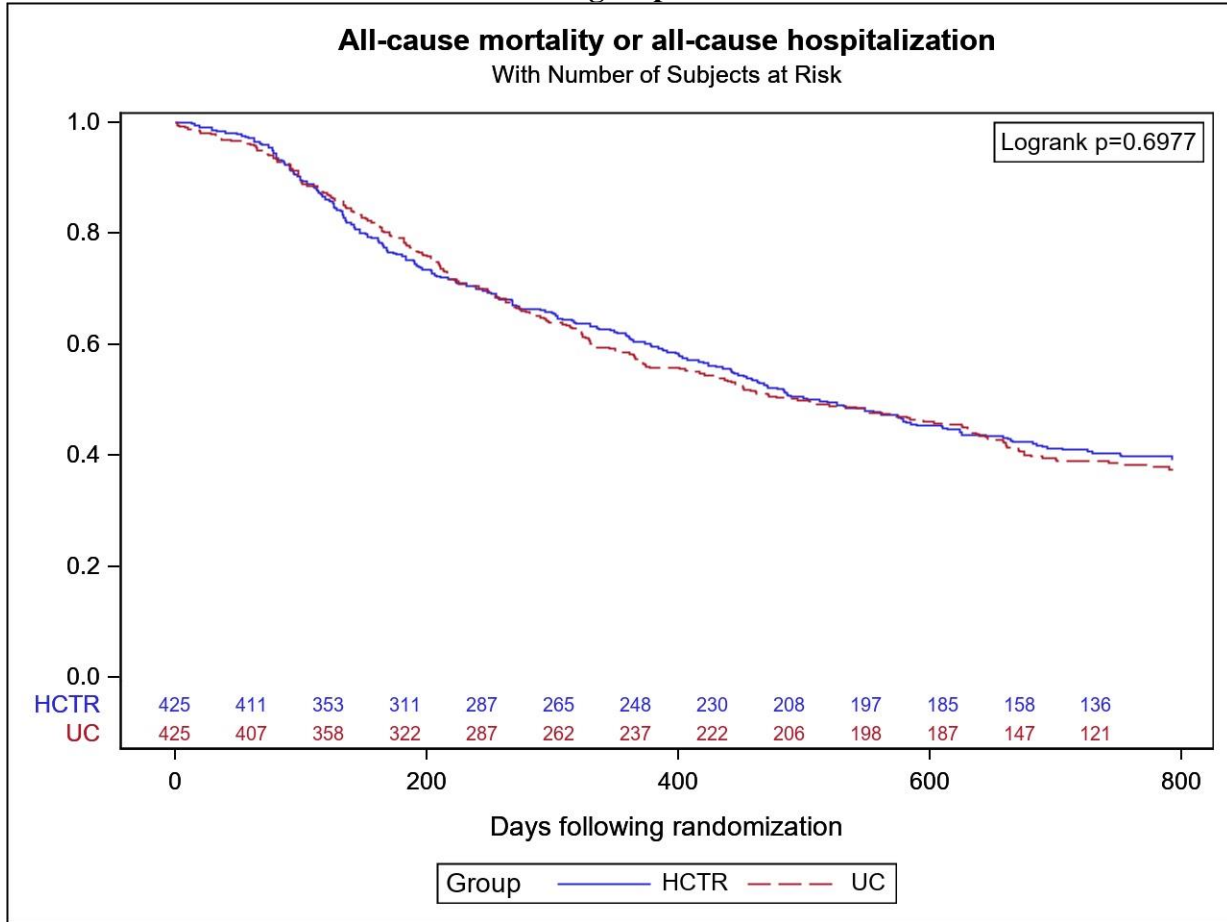

HCTR- hybrid comprehensive telerehabilitation; UC – usual care

**eFigure 7. Secondary Outcomes by Site**

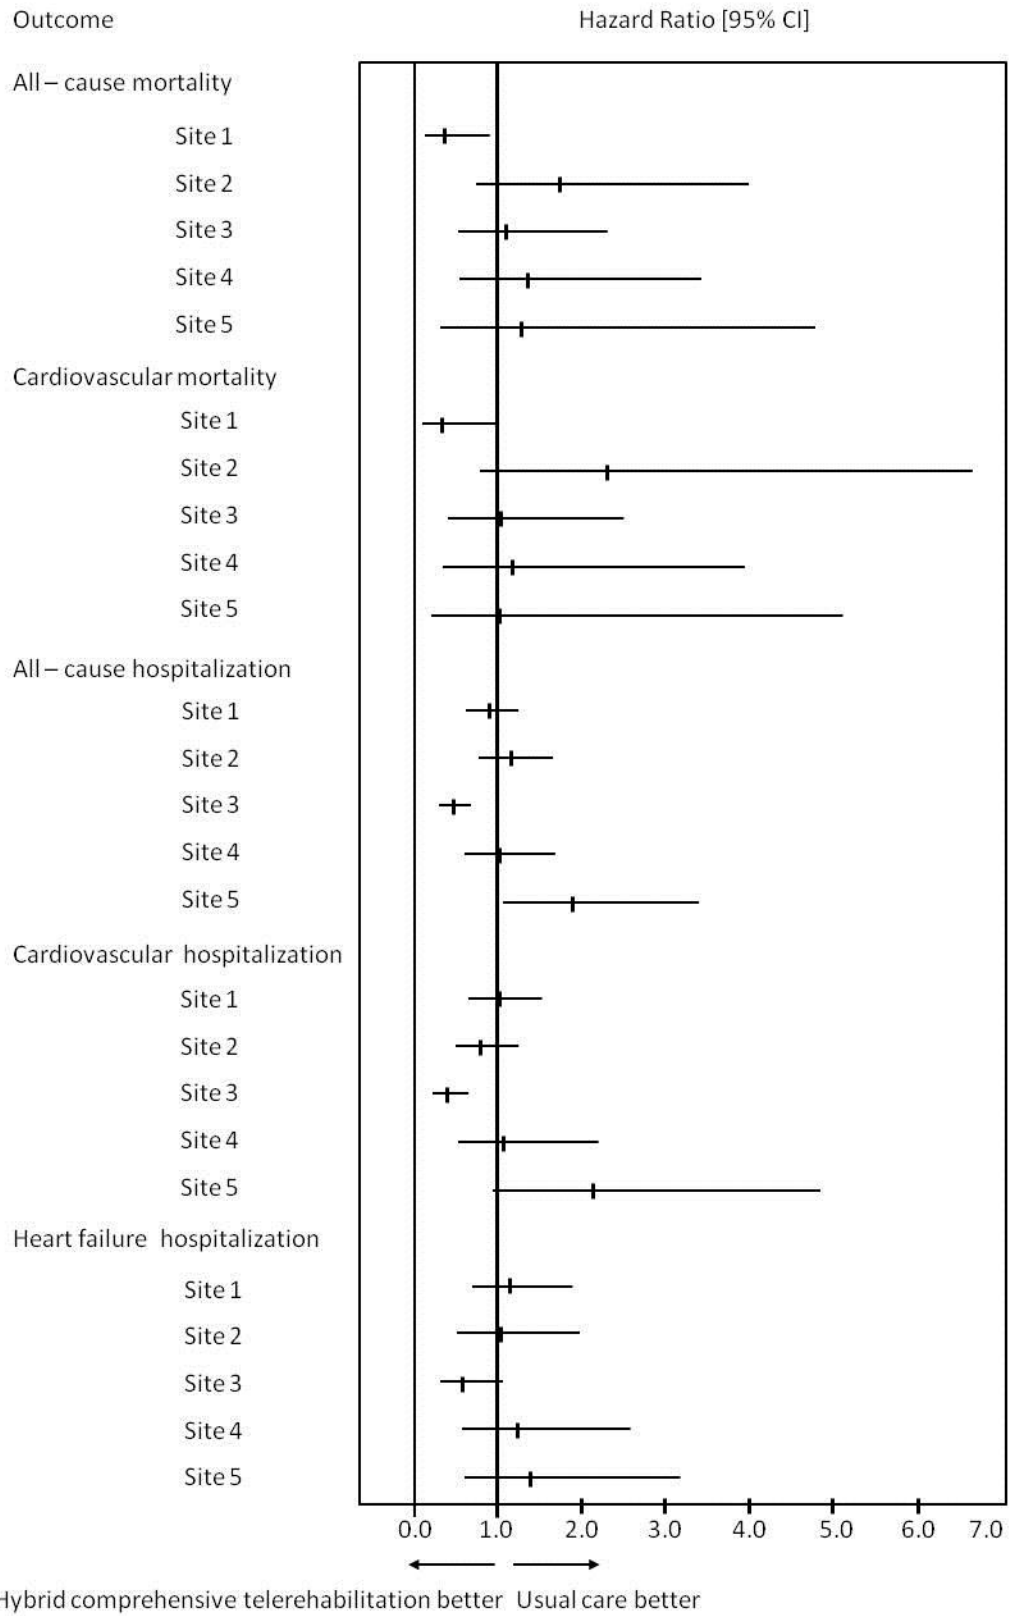

Supplement: jamacardiol-5-300-s001.pdf [file jamacardiol-5-300-s001.pdf]
