# Supplementary material
Source: PubMed Central journal article supplement (PMC6865325)
Supplement: jamacardiol-5-300-s002.pdf [file jamacardiol-5-300-s002.pdf]

1 **Study protocol**

2 **Title**

3 **Applying telemedicine technologies in a novel model of organizing and implementing**  
4 **comprehensive cardiac rehabilitation in heart failure patients – TELEREH-HF.**

5 **Introduction**

6 Heart failure (HF) epidemic is an aggressively developing phenomenon, stimulated by developing  
7 civilization and generating worrying economic and social effects.<sup>1,2</sup> The benefits of cardiac  
8 rehabilitation in HF patients are well established.<sup>3</sup> Therefore current guidelines strongly recommend  
9 exercise training as an important component of HF management.<sup>1-6</sup> Despite these facts, many HF  
10 patients do not undergo the programmes of cardiac rehabilitation.<sup>3</sup> In Poland, cardiac rehabilitation  
11 availability is highly unsatisfactory (around 8%) and unacceptably varied (0.5-70%).<sup>7,8</sup> With the  
12 existing organization and technical background, improving this situation seems impossible. Therefore  
13 we create the project: „To apply telemedicine technologies to implement a novel model of home-based  
14 comprehensive cardiac rehabilitation in HF patients”.

15 The project will enable early secondary prevention in the population of people with HF to be  
16 implemented. It will be achieved via:

- 17• Novel concept - "From Hospital To Home"
- 18• Novel technology - telemedicine
- 19• Novel method of comprehensive cardiac rehabilitation implementation

20

21 Hybrid comprehensive TELEREHabilitation in Heart Failure patients (TELEREH-HF) -  
22 a randomized, multi-center, prospective, open-label, parallel group controlled trial .

23 The TELEREH-HF trial is design to determine if a hybrid model of comprehensive telerehabilitation  
24 (TR) in HF patients influences days alive and out of hospital (DAOH) and prognosis when compared  
25 with usual care.

26

## 27 **Objectives**

28 **The primary** objective of the TELEREH-HF trial is to determine whether introducing a novel hybrid  
29 model of comprehensive TR in HF patients will significantly increase DAOH when compared with  
30 usual care.

31 **The secondary** objectives are to assess the effects of a hybrid comprehensive TR compared to usual  
32 care on all-cause and cardiovascular (CV) mortality and all-cause, CV and HF hospitalization.

33 **The tertiary analyses** will include: evaluation of the safety, effectiveness, quality of life (QoL),  
34 depression, anxiety, patients acceptance of and adherence to a hybrid comprehensive TR.

35

## 36 **Study design**

37 The TELEREH-HF study is a randomized, multicenter, prospective, open-label, parallel group  
38 controlled trial introducing a novel hybrid comprehensive TR in HF patients.

39 The study conduct is guided by good clinical practice, in accordance with the Declaration of  
40 Helsinki and the laws and regulations applicable in Poland.

41 The main investigator and Steering Committee designed the trial and wrote the study protocol. The  
42 study was approved by the local Ethics Committee. An independent Data Safety Monitoring Board  
43 will review patient data and a Clinical Endpoint Committee, blinded to treatment allocation, is  
44 appointed to adjudicate deaths and hospitalisations (**Table 1**). Each patient is obliged to provide  
45 written informed consent.

46

47 **Table 1.** The Principal Investigator, Members of the Steering Committee, The Data Safety  
48 Monitoring Board and The Clinical Endpoint Committee

|                              |                                                                                                                                                                                                         |
|------------------------------|---------------------------------------------------------------------------------------------------------------------------------------------------------------------------------------------------------|
| Principal Investigator       | Ewa Piotrowicz MD, PhD                                                                                                                                                                                  |
| Steering Committee           | Grzegorz Opolski MD, PhD (Warsaw, Poland; Chair), Maciej Banach MD, PhD Łódź, Poland), Michael Pencina PhD (Durham, NC, USA), Ryszard Piotrowicz (Warsaw, Poland), Wojciech Zaręba (Rochester, NY, USA) |
| Data Safety Monitoring Board | Tomasz Krauze PhD (Poznań, Poland; Chair), Rafał Dąbrowski MD, PhD (Warsaw, Poland), Marcin Grabowski MD, PhD (Warsaw, Poland)                                                                          |
| Clinical Endpoint Committee  | Mariusz Pytkowski MD, PhD (Warsaw, Poland; Chair), Paweł Krześciński MD, PhD (Warsaw, Poland), Mariusz Kruk MD, PhD (Warsaw, Poland)                                                                    |

49

50 The study is ongoing in 5 centers in Poland:

- 51
- Institute of Cardiology, Warsaw (Coordinating Center),
- 52
- Medical University of Gdansk,
- 53
- Silesian Center for Heart Diseases in Zabrze,
- 54
- Medical University of Lodz,
- 55
- Medical University of Warsaw.

56

57 **Study population, recruitment and randomization**

58 The TELEREH-HF study has a target enrollment of 850 clinically stable HF patients (New  
59 York Heart Association [NYHA] class I, II or III and left ventricular ejection fraction [LVEF]  $\leq$  40%)  
60 after a cardiovascular (CV) hospitalization incident within 6 months prior to randomization. The  
61 inclusion and exclusion criteria are shown in **Table 1**.

62 **Table 2. Inclusion and Exclusion Criteria**

63

| <b>Inclusion Criteria</b>                                                                                                                                                                                                                                                                                                                                                                                                                                                                                                                                                                                                                                                                                                                                                               |
|-----------------------------------------------------------------------------------------------------------------------------------------------------------------------------------------------------------------------------------------------------------------------------------------------------------------------------------------------------------------------------------------------------------------------------------------------------------------------------------------------------------------------------------------------------------------------------------------------------------------------------------------------------------------------------------------------------------------------------------------------------------------------------------------|
| Patients eligible for the trial have to meet the following criteria of randomization, i.e. patients need to: <ul style="list-style-type: none"> <li>- be of either sex with any aetiology of left ventricular systolic heart failure as defined in the ESC guidelines</li> <li>- have a LVEF <math>\leq</math> 40% on echocardiography</li> <li>- belong to NYHA class I, II or III</li> <li>- have had a hospitalization incident within 6 months prior to randomization</li> <li>- be stable clinically (a patient does not need intravenous medication or has not had therapy modified for at least 7 days)</li> <li>- have no contraindications to undergo cardiopulmonary exercise test</li> <li>- be able to exercise using the new model of hybrid telerehabilitation</li> </ul> |

| <b>Exclusion Criteria</b>                                                                                                                                                                                                                                                                                                                                                                                                                                                                                                                                                                                                                                                                                                                                                                                                                                                                                                                                                                                                                                                                                                                                                                                                                                                                                                                                                                                                                                                                                                                                                                                                                                                                                                                                                                                                                                                                                       |
|-----------------------------------------------------------------------------------------------------------------------------------------------------------------------------------------------------------------------------------------------------------------------------------------------------------------------------------------------------------------------------------------------------------------------------------------------------------------------------------------------------------------------------------------------------------------------------------------------------------------------------------------------------------------------------------------------------------------------------------------------------------------------------------------------------------------------------------------------------------------------------------------------------------------------------------------------------------------------------------------------------------------------------------------------------------------------------------------------------------------------------------------------------------------------------------------------------------------------------------------------------------------------------------------------------------------------------------------------------------------------------------------------------------------------------------------------------------------------------------------------------------------------------------------------------------------------------------------------------------------------------------------------------------------------------------------------------------------------------------------------------------------------------------------------------------------------------------------------------------------------------------------------------------------|
| <p>None of the following conditions may exist at randomisation:</p> <ul style="list-style-type: none"> <li>- NYHA class IV</li> <li>- unstable angina</li> <li>- unstable clinical status</li> <li>- a history of acute coronary syndrome within the last forty days in patients with LVEF <math>\leq</math> 35%</li> <li>- percutaneous angioplasty within the last 2 weeks</li> <li>- coronary artery bypass grafting within the last 3 months</li> <li>- implantation/initiation of CRT-P or CRT-D or ICD or PM within the last six weeks</li> <li>- lack of ICD, CRT-P or CRT-D or PM therapy despite the indications for implantation according to ESC guidelines</li> <li>- intracardiac thrombus</li> <li>- rest heart rate <math>&gt;</math>90/min</li> <li>- tachypnoe <math>&gt;</math>20 breaths per minute</li> <li>- symptomatic and/or exercise-induced cardiac arrhythmia or conduction disturbances</li> <li>- acute myocarditis and/or pericarditis</li> <li>- valvular or congenital heart disease requiring surgical treatment</li> <li>- hypertrophic cardiomyopathy</li> <li>- severe pulmonary disease</li> <li>- uncontrolled hypertension</li> <li>- anemia (hemoglobin <math>&lt;</math>11.0 g/dL)</li> <li>- physical disability related to severe musculoskeletal or neurological problems</li> <li>- recent embolism</li> <li>- thrombophlebitis</li> <li>- acute or chronic inflammatory disease</li> <li>- acute or chronic decompensated non-cardiac diseases (thyreotoxicosis, uncontrolled diabetes)</li> <li>- active malignant neoplastic diseases with survival prognosis below 2 – 5 years</li> <li>- orthotropic heart transplant in anamnesis</li> <li>- presence of an implanted left ventricular assist device or biventricular assist device</li> <li>- aortic aneurysm</li> <li>- severe psychiatric disorder</li> <li>- patient's refusal to participate</li> </ul> |

64 ESC - European Society of Cardiology, LVEF - left ventricular ejection fraction, NYHA - New York Heart  
65 Association, CRT-P - cardiac resynchronization therapy, CRT-D - cardiac resynchronization therapy and  
66 implantable cardioverter-defibrillator, ICD - implantable cardioverter-defibrillator, PM - pacemaker  
67

68 Eligible patients will be randomized in 1:1 ratio to either hybrid TR + usual care (TR group)  
69 or to usual care only control group (CG) via a secure web-based randomization system – Research  
70 Electronic Data Capture (REDCap) housed in the Coordinating Center.<sup>9</sup> All sites will use the same  
71 allocation process to ensure uniform randomization.

72 The study schedule is shown in **Figure 1**.

73  
74  
75  
76  
77  
78

**Figure 1.** The study schedule and follow-up.

79  
80  
81  
82  
83  
84  
85  
86  
87  
88  
89

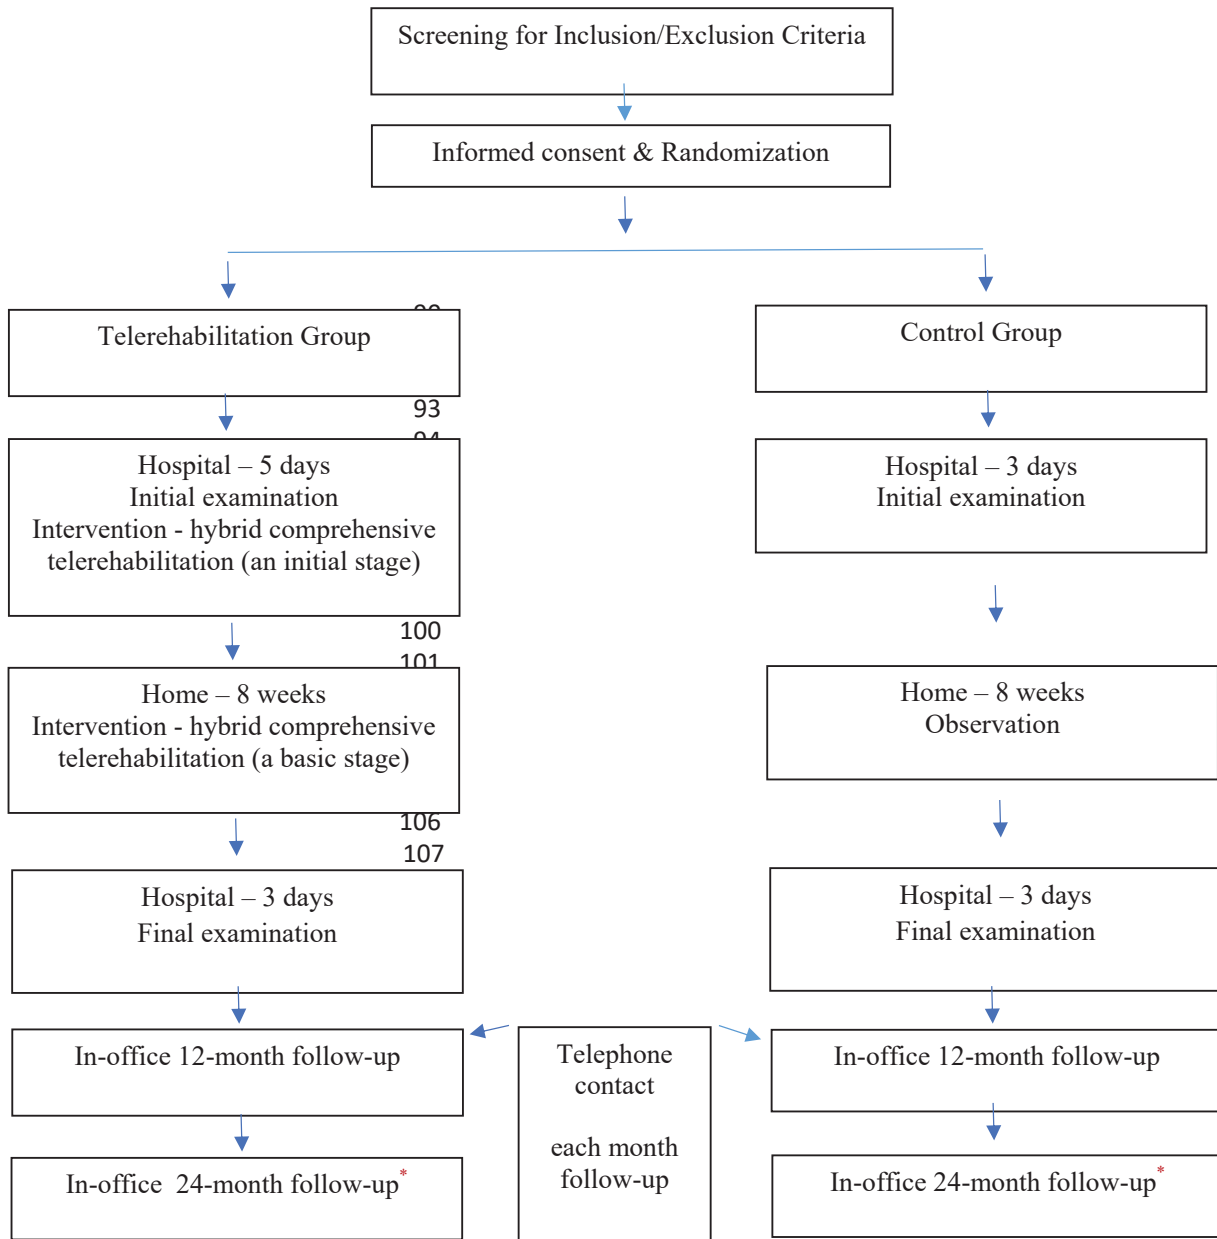

112  
113  
114  
115  
116

\* All patients whose 24-month follow up is not later than 31/03/2019 (in accordance with the regulations of the National Center for Research and Development).

### 117 **Intervention in Telerehabilitation Group**

118 The TR group patients will undergo a 9-week hybrid comprehensive TR program consisting of  
119 two stages: an initial stage (1-week) conducted at hospital and a basic stage 8-week home-based TR

120 five times weekly. The goals of the initial stage are: a baseline clinical examination, optimization of  
121 treatment, education, individual planning of exercise training and performing five monitored  
122 educational training sessions. The basic stage, which is conducted at home consisted of two parts, is  
123 performed prior to each training session: the first part - the training consent procedure is required for a  
124 patient to access each training session, and the second part - the training session.<sup>10-12</sup>

125

## 126 **Telemonitoring**

### 127 Remote monitoring during rehabilitation and training consent procedure.

128 Telerehabilitation is carried out by a medical team and advanced monitoring systems are used.  
129 A TR medical team is composed of: physicians, physiotherapists, nurses and a psychologist. The  
130 monitoring system includes: (1) a special remote device for tele-ECG-monitored and supervised  
131 exercise training - TR set (manufactured by Pro Plus Company, Poland), which consists of: EHO mini  
132 device, blood pressure measuring and weighing machine, (2) data transmission set via a mobile phone,  
133 (3) a monitoring centre capable of receiving and storing patients' medical data (specialized hardware  
134 and software are necessary).<sup>10-12</sup>

135 **Figure 2.** Telerehabilitation set — a weighing machine, the EHO mini device, a manometer.  
136

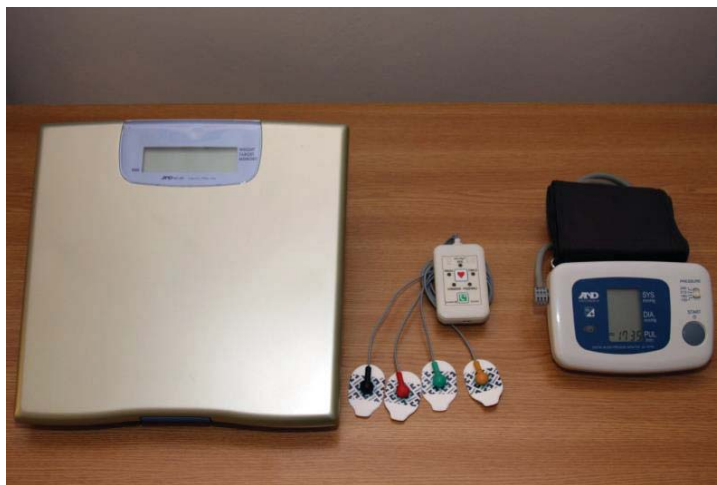

137

138

139           The TR group patients will receive a TR set and mobile phone. The EHO mini device is able  
140 to record ECG data from three pre-cordial leads and transmit them via a mobile phone network to the  
141 monitoring center. An EHO mini device has training sessions preprogrammed individually for each  
142 patient (defined exercise duration, breaks, timing of ECG recording). The moments of automatic ECG  
143 registration are preset and coordinated with the exercise training. The planned training sessions are  
144 executed with the device indicating what needed to be done with sound and light signals. There are  
145 sound signals in the form of bleeps and light signals from color emitting diodes. Bleeps and green  
146 diode blinking meant that the patient has to perform exercise. Another set of bleeps and red diode  
147 blinking meant “stop exercise”. The timing of automatic ECG recordings correspond to peak exercise.

148           An EHO mini device has a tele-event-Holter ECG feature as well. It enables a patient,  
149 whenever a worrying symptom occurs, to register and immediately send the ECG recording via mobile  
150 phone network to the telemonitoring center.<sup>10-12</sup>

151           Before beginning a training session, patients will use the mobile phone to answer a series of  
152 questions regarding their present condition, including fatigue, dyspnea, blood pressure, body mass,  
153 and medication taken. Patients then will transmit resting ECG data to the monitoring center. Before  
154 giving permission to start the training session, the medical staff also will analyze data from the remote  
155 monitoring of CIEDs. If no contraindications to training are identified, patients will be given  
156 permission to start the training session.<sup>10-12</sup> The system is used to monitor and control the training in  
157 any place where the patient will decide to exercise. If the training session is completed uneventfully,  
158 the patient will transmit the ECG recording via the mobile phone network to the monitoring center  
159 immediately after the end of every training session. The ECG recordings will be analyzed at the  
160 monitoring center, and the safety, efficacy, and accuracy of a tailored patient’s rehabilitation program  
161 will be assessed. Using the data on heart rate (HR) during exercise and the patient’s subjective  
162 evaluation of the perceived exertion according to Borg scale, consultants will be able to adjust the  
163 training workload appropriately or, if necessary, to discontinue the session. Telephone contact is also  
164 use for psychological support.<sup>10-12</sup>

165

166 Remote monitoring of cardiac implantable electronic devices (CIEDs)

167           Additionally, TRG patients with CIEDs (if technical requirements were complied with) will  
168 receive the transmitter (Biotronik - CardioMessenger; Medtronic transmitter [Home Monitor] of the  
169 CareLink™ network; St-Jude – Merlin@home™ wireless transmitter) which allows the automatic  
170 transmission of data from the implant to a web-based monitoring platform (Biotronik – Home  
171 Monitoring Service Center, Medtronic – CareLink-Network , St-Jude – Merlin.net™Patient Care  
172 Network). Remote monitoring will rely on data acquired automatically on a daily basis by the device,  
173 with unscheduled transmission of any predefined alerts to the medical staff in each center. These alerts  
174 involved device integrity [e.g. battery status- the battery depletion indicators: end of service (EOS), the  
175 elective replacement indicator (ERI) lead impedance], programming issues [e.g. disabling of  
176 ventricular fibrillation (VF) therapy, antitachycardia pacing (ATP) therapy, insufficient safety margins  
177 for sensing or capture], and medical data [e.g. arrhythmias – supraventricular tachycardia (SVT)/atrial  
178 fibrillation (AF)/atrial flutter (AFI), ventricular tachycardia (VT)/VF, indication of lung fluid  
179 accumulation].

180           In addition, each patient with CIEDs and a remote monitoring device will have scheduled  
181 standard follow-up visits in order to evaluate the device functioning [after four weeks from the  
182 beginning of hybrid TR in TRG and usual care in CG and immediately after the intervention (after 9  
183 weeks) in the TG and the observation period in CG]. The following parameters will be evaluated:  
184 mean heart rates, patient activity, supraventricular (SVT, AF/AFI) and ventricular [non-sustained VT  
185 (nsVT), VT/VF] arrhythmia, impedance, percentage of resynchronization stimulation, intracardiac  
186 electrogram (IEGM).

187

188 Exercise training

189           Cardiac rehabilitation is planned according to the published guidelines for HF patients.<sup>1-3</sup> In  
190 order to ensure patients safety, the following recommendations will be taken into account: (1) special  
191 attention is paid to appropriate patient risk stratification before cardiac rehabilitation; (2)  
192 contraindications to exercise training are never overlooked (**Table 3**); (3) in patients with an



193 implantable cardioverter-defibrillator (ICD), maximal training HR is set at 20 b.p.m. lower than the  
 194 ICD discharge threshold; and (4) in patients with a pacemaker, cardiac resynchronization therapy  
 195 (CRT-P), cardiac resynchronization therapy and implantable cardioverter-defibrillator (CRT-D), the  
 196 rate-response function is switched on, enabling HR adjustment to the physical effort which facilitated  
 197 reaching the desired training HR.

198 **Table 3. Contraindications to exercise training**  
 199

|                                                                                                                                                                                                                                                                                                                                                                                                                                                                                                                                                                                                                                                                                                                                           |
|-------------------------------------------------------------------------------------------------------------------------------------------------------------------------------------------------------------------------------------------------------------------------------------------------------------------------------------------------------------------------------------------------------------------------------------------------------------------------------------------------------------------------------------------------------------------------------------------------------------------------------------------------------------------------------------------------------------------------------------------|
| Acute worsening of exercise tolerance, dyspnoea or chest pain<br>Increase of 1.8 kg or more in body mass over the previous 1–3 days<br>Supine resting heart rate > 90 beat per minute<br>New-onset cardiac arrhythmias: atrial fibrillation/atrial flutter/supraventricular tachycardia, complex<br>ventricular arrhythmia at rest or appearing with exertion<br>New-onset advanced atrioventricular block<br>New-onset of significant ischaemia during low-intensity exercise<br>Decrease in systolic blood pressure with exercise<br>Uncontrolled hypertension, resting blood pressure >140/90 mmHg<br>Recent embolism<br>Recent thrombophlebitis<br>Acute systemic illness<br>New-onset uncontrolled endocrine and metabolic disorders |
|-------------------------------------------------------------------------------------------------------------------------------------------------------------------------------------------------------------------------------------------------------------------------------------------------------------------------------------------------------------------------------------------------------------------------------------------------------------------------------------------------------------------------------------------------------------------------------------------------------------------------------------------------------------------------------------------------------------------------------------------|

200

201 Exercise trainings will be planned individually for each patient during hospitalization.<sup>3</sup>

202 The telerehabilitation program encompasses three training modalities: endurance aerobic Nordic  
 203 walking training, respiratory muscle training and light resistance and strength exercises. The details  
 204 are presented in **Table 4** and **Table 5**.<sup>6,10,11</sup>

205 **Table 4. Exercise training model**  
 206  
 207

| Type of exercise training  | Exercise prescription                                                                                                                                                                                                                                                                                                                                                                                                                                                                                                                                                                                                                         |
|----------------------------|-----------------------------------------------------------------------------------------------------------------------------------------------------------------------------------------------------------------------------------------------------------------------------------------------------------------------------------------------------------------------------------------------------------------------------------------------------------------------------------------------------------------------------------------------------------------------------------------------------------------------------------------------|
| Aerobic endurance training | <b>Devices:</b> Nordic walking poles<br><b>Training session</b> consists of:<br>1. Warm-up: breathing and light resistance exercises using poles for Nordic walking;<br>duration 5–10 min<br>2. Nordic walking training<br><b>Intensity:</b><br>40-70% of heart rate reserve,<br>perceived exertion level—score of 11-12 on the Borg scale<br><b>Duration:</b><br>start at 10 min/session/day <sup>a</sup><br>15 min/session/day <sup>b</sup> 20 min/session/day <sup>c</sup><br>gradually increased to 30–45 min/session/day <sup>d</sup><br>3. Cool down: relaxation, breathing exercise; duration 5 min<br><b>Frequency:</b> 1 session/day |

|                                  |                                                                                                                                                                                                                                                                                                                                                                                                                                     |
|----------------------------------|-------------------------------------------------------------------------------------------------------------------------------------------------------------------------------------------------------------------------------------------------------------------------------------------------------------------------------------------------------------------------------------------------------------------------------------|
| Respiratory muscle training      | <b>Devices:</b> Train Air software - during the initial stage at the hospital<br>Threshold Inspiratory Muscle Trainer - during the basic stage at home<br><b>Intensity:</b> start at 30% of the maximal inspiratory mouth pressure ( $PI_{max}$ ) and readjusted to a maximum of 60% (if possible)<br><b>Duration:</b><br>minimum 5-10 minutes/day<br>maximum 20-30 minutes/day;<br><b>Frequency:</b> 3-5 times/ throughout the day |
| Resistance and strength training | <b>Devices:</b> Thera Band - yellow color<br><b>Intensity:</b> 5-10 repetitions of each of the seven exercises (see Appendix 2)<br><b>Duration:</b> gradually increased 5-10-15 minutes/day<br><b>Frequency:</b> 1 session/ day                                                                                                                                                                                                     |

208  
209  
210  
211  
212

Duration of aerobic endurance training depended on the functional capacity in baseline cardiopulmonary exercise test:

<sup>a</sup>baseline peak  $VO_2$  below 10 mL/kg/min.

<sup>b</sup>baseline peak  $VO_2$ : 10–18 mL/kg/min.

<sup>c</sup>baseline peak  $VO_2$  over 18 mL/kg/min.

213

214 **Table 5. Resistance and strength exercise using Thera band**

215

|                                                                                                                                                                                                                         |
|-------------------------------------------------------------------------------------------------------------------------------------------------------------------------------------------------------------------------|
| <p><b>Upper limbs</b></p>                                                                                                                                                                                               |
| <p><b>Exercise 1.</b> Position: sitting, the center of the band under the right / left foot. We keep the ends of the tape in the right / left hand. Flexing the right / left elbow.</p>                                 |
|                                                                                                                                      |
| <p><b>Exercise 2.</b> Position: sitting, the center of the band under the right / left foot. We keep the ends of the band in the right / left hand. Raise the right / left upper limb to the level of the shoulder.</p> |

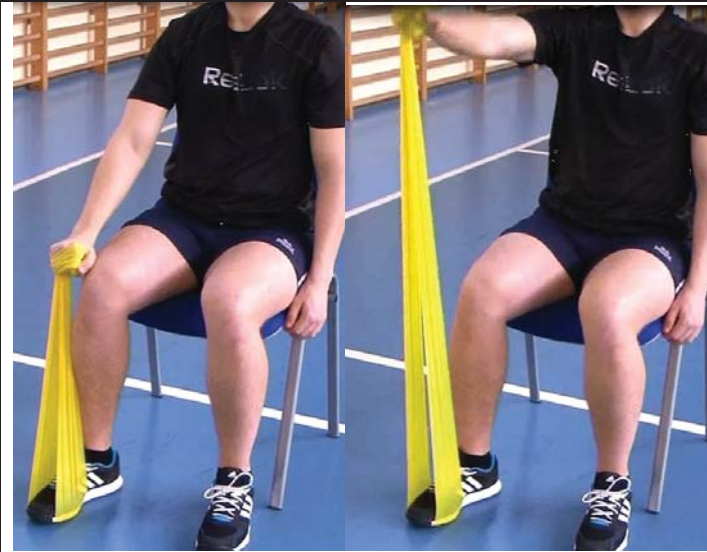

**Exercise 3.** Position: sitting, band placed on the back. We grab the ends of the band. Upper limbs flex at the elbows at the chest level, hands keep the tape slightly taut. We stretch the tape as far forward as possible, trying to keep the movement horizontally at chest level.

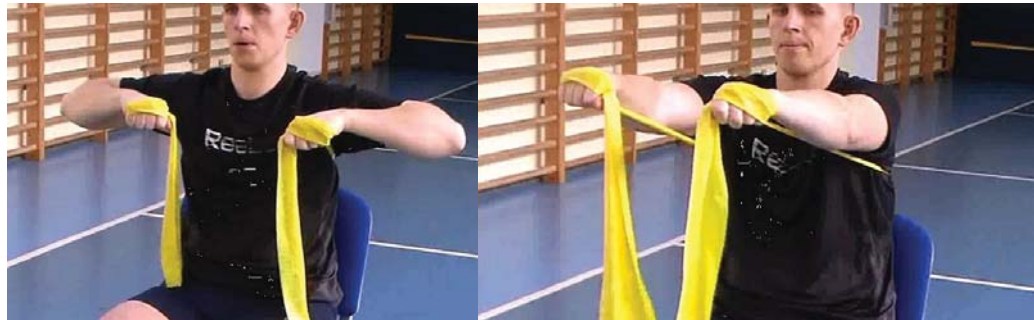

**Exercise 4.** Position: standing in the middle of the band. The band crossed in front of the body. Abduction of the arms and returning to the starting position.

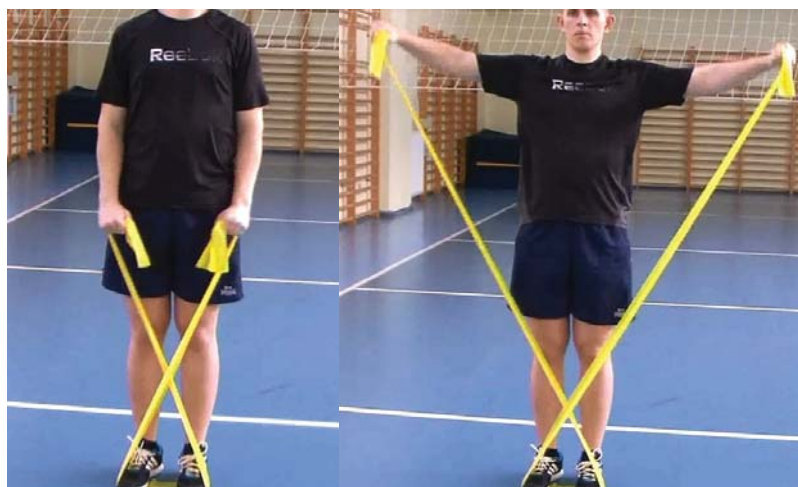

## Lower limbs

**Exercise 5.** Position: sitting, the center of the band under the foot, the ankle joint extended (dorsiflexion). The ends of the band are held in the hands at the level of the knee joint. The band tight. Plantar flexion of the ankle.

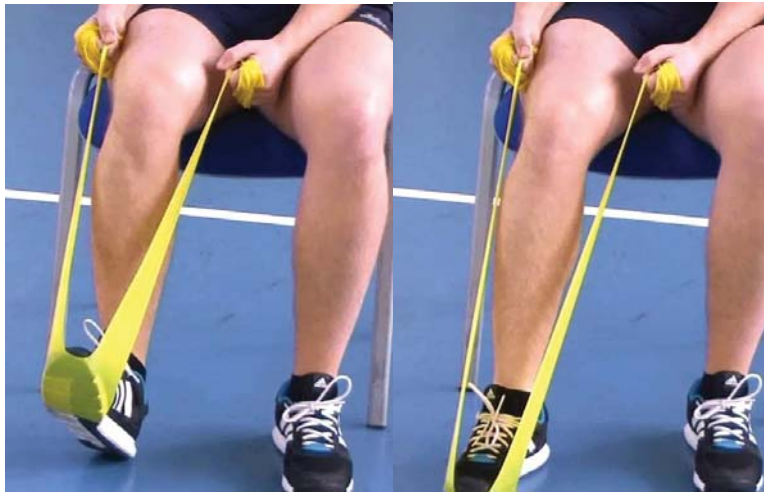

**Exercise 6.** Position: sitting, the hip and knee joint bent. Wrap the band wrapped around the foot with both hands. Hands are placed on the chest. Extension in the hip and knee joint.

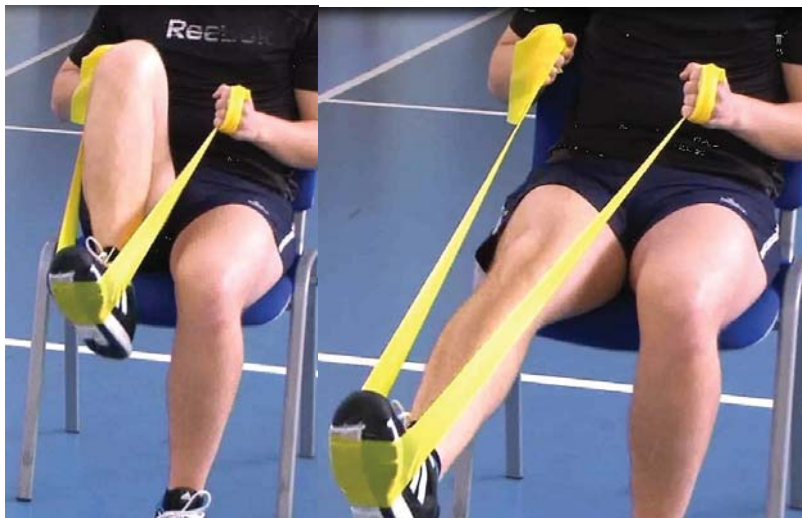

**Exercise 7.** Position: Standing in a light stride, place the widely spread band under the foot of the supporting leg and attach it at the height of the ankle joint of the other limb. Abduction of the lower limb.

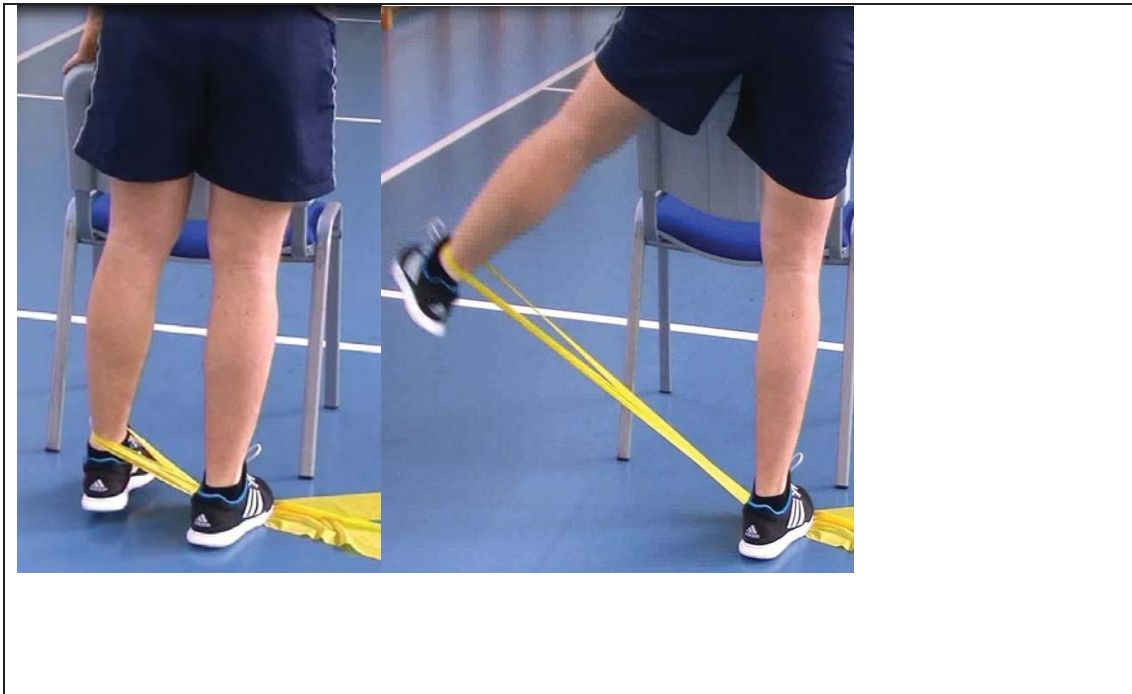

216

217           The chosen workload during Nordic walking is supposed to reflect individual effort tolerance  
218 with regard to: (1) perceived exertion according to the Borg scale and (2) the training HR range  
219 established individually for each patient based on cardiopulmonary exercise test (CPET) perform  
220 before the start of the TR program. In line with the recommendations, the assumption is that patients  
221 are not to exceed perceived moderate exertion during exercise training (i.e. a score of 11-12 on the  
222 Borg scale). The training HR is calculated using the method known as HR reserve. This method uses a  
223 percentage of the difference between the maximum HR and the resting HR rate, and adds this value to  
224 the resting HR. The target training HR is 40–70% of the HR reserve. Patients train five times a week.<sup>11</sup>

225

#### 226 Education

227           Education program is designed and run by the TR team. Patients will be taught how to self-  
228 evaluate, how to measure HR, blood pressure, body mass, how to performed all modalities of exercise  
229 training, how to evaluate the level of perceived exertion according to the Borg scale and how to  
230 operate a TR set. Education will also encompass nutritional counselling, lipid management, smoking  
231 cessation, vocational and psychosocial support.<sup>6,10-12</sup>

232

233 **Control Group**

234 Patients randomized to the CG will undergo baseline clinical examinations during a 3-day  
235 hospitalisation and then will be under observation until the end of the 9<sup>th</sup> week and will receive usual  
236 care appropriate for their clinical status and standardized within a particular center (some of them can  
237 participate in a rehabilitation program and some of them has remote monitoring of CIEDs). After the  
238 9<sup>th</sup> week patients will undergo final assessments during a 3-day hospitalization.

239 All patients, regardless of the treatment group, will receive recommendations for suitable  
240 lifestyle changes and self-management according to guidelines.<sup>1-10</sup>

241

242 **Clinical examinations**

243 All 850 patients will undergo the following assessments at entry (during 5 days of  
244 hospitalization-TRG, and 3 days of hospitalisation-CG) and after completing the 9-week program  
245 (during 3 days hospitalisations – both groups): clinical examination with symptom evaluation (NYHA  
246 class), blood testing [blood count, serum creatinine, electrolytes (sodium, potassium), glycaemia, N-  
247 terminal pro B-type natriuretic peptide (NT-proBNP), aspartate aminotransferase, alanine  
248 aminotransferase, thyroid stimulating hormone (TSH), international normalized ratio (INR),  
249 urinalysis], ECG, two-dimensional echocardiography, six-minute walk test (6-MWT), CPET, 24 hours  
250 holter ECG monitoring, evaluation of CIEDs proper functioning, and psychological assessment: the  
251 QoL based on SF-36 Survey; the depression based on Beck inventory; the anxiety based on STAY.<sup>6,10-</sup>  
252 <sup>12</sup>Additionally, after 9 weeks, the TRG will be analyzed for: safety and patients' acceptance of and  
253 adherence to hybrid comprehensive TR.

254

255 **Evaluation of novel model of hybrid comprehensive telerehabilitation in terms of tertiary**  
256 **analyses**

257 Assessment of hybrid comprehensive TR effectiveness.

258 The effectiveness of TR and the comparison of the two arms will be based on the analysis of  
 259 changes (between entry and 9 weeks – intervention period in TRG and observation period in CG) of  
 260 the following parameters: HF functional class according to NYHA, CPET duration, peak oxygen  
 261 consumption (pVO<sub>2</sub>), % of predicted peak VO<sub>2</sub> (pVO<sub>2</sub>%N), 6-MWT distance, QoL (SF-36) score,  
 262 depression and anxiety assessment.

263

264 Assessment of hybrid comprehensive TR safety.

265 The safety assessment will include the incidence of: adverse events (ischemic symptoms,  
 266 dyspnea – tachypnoe > 20/min, syncope or fainting, passing to a higher NYHA class, putting on  
 267 ≥1.8kg body mass during 1-3 days, symptomatic drop in systolic blood pressure, SVT, AF, nsVT, VT,  
 268 VF, II and III degree atrio-ventricular block, resting HR ≥100/min, left- and/or right-ventricular  
 269 insufficiency, need for urgent hospitalization, death) during exercise training, directly following it (up  
 270 to 1 hour) and adverse events regardless of the training (including data from remote monitoring of  
 271 CIEDs).

272

273 Assessment of the patients' acceptance of hybrid comprehensive TR.

274 The patients' acceptance of TR will be analyzed based on a 12-item questionnaire filled out by  
 275 patients at the end of TR, which will include the assessment of: difficulties in operating the TR set, the  
 276 influence of the TR set of their perceived safety, patients' compliance to the recommendations on  
 277 pharmacotherapy, nutrition and their lifestyle (**Table6**)<sup>12</sup>.

278 **Table 6.** Patients' acceptance of hybrid comprehensive telerehabilitation questionnaire.

| Questions                                                                                                   | Answers (%)                                      |
|-------------------------------------------------------------------------------------------------------------|--------------------------------------------------|
| 1. Did you control the device by yourself ?                                                                 | Yes/No                                           |
| 2. Was operating the device:                                                                                | Very easy / Easy /<br>Difficult / Very difficult |
| 3. Was accurate placing electrodes on your skin difficult?                                                  | Yes/No                                           |
| 4. Did you observe any significant skin reaction to electrodes?                                             | Yes/No                                           |
| 5. When using provided equipment to communicate with monitoring centre, was the sound quality satisfactory? | Yes/No                                           |
| 6. Did you find it difficult to coordinate exercise with the instructions from the device?                  | Yes/Sometimes/No                                 |

|                                                                                                                                |                                                                 |
|--------------------------------------------------------------------------------------------------------------------------------|-----------------------------------------------------------------|
| 7. Was transmitting data (ECG, blood pressure) troublesome?                                                                    | Yes/Sometimes/No                                                |
| 8. Did you ever miss doing a telerehabilitation session because of technical problems?<br>If Yes, how many times?              | Yes/No                                                          |
| 9. When did you use the telemedicine equipment?                                                                                | Only during exercise<br>During exercise and when I felt unwell  |
| 10. Did TR stimulate you to do exercise?                                                                                       | Yes/Moderately/No                                               |
| 11. Did you feel safer during TR than when you did exercises at home without supervision?                                      | Yes/No                                                          |
| 12. Did TR make you increase your everyday activities?<br>Physical exercises<br>Mental<br>Social<br>Professional<br><br>Sexual | Yes/No<br>Yes/No<br>Yes/No<br>Yes/No<br>no applicable<br>Yes/No |

279 ECG - electrocardiogram; TR - telerehabilitation

280

281 Assessment of the adherence to hybrid comprehensive TR.

282 Adherence during TR will be assessed based on the daily telephone contact with the  
283 monitoring centre, which is required to obtain the necessary permission for the training and  
284 compliance to the exercise training. Adherence is defined as the percentage of patients who carry out  
285 the prescribed exercise training. According to the recommendations, in terms of their adherence, the  
286 patients will be divided into three groups: the first group are adherent patients, i.e. patients who adhere  
287 both to the number of training sessions prescribed and to the duration of the prescribed cycle by at  
288 least 80%; the second category consisted of non-adherent patients, who adhere < 20% to the  
289 prescribed number of training sessions and their duration. The third group correspond to the partially  
290 adherent patients who carry out the prescribed exercise, yet tend to omit some of them or do not carry  
291 them out for the prescribed duration (i.e. who adhere  $\geq 20\%$  and  $< 80\%$ ).<sup>13</sup>

292 **Follow-up**



293 All patients will be followed up for a maximum of 24 months with a maximum of two check-  
294 up visits within the 12 and 24 months following the end of the preliminary 9-week training program in  
295 TRG and the observational period in CG. Each month follow-up will be also conducted via telephone  
296 (conversations with the patient and/or family member) in order to collect data about primary and  
297 secondary endpoints. All patients will be followed-up for a maximum of 24 months after the 9-week  
298 period.

### 299 **Primary hypothesis sample size considerations**

300 The primary study hypothesis is that TRG strategy is superior to CG strategy resulting in a  
301 larger percent of DAOH. Because possible follow-up varies between patients (12 to 24 months after  
302 the 9-week training period), the primary analysis will rely on the percent of DAOH calculated as the  
303 ratio of the DAOH divided by total days of follow-up for each patient.

304 The sample size for this study is calculated assuming 1:1 treatment allocation ratio, and an  
305 overall two-sided level of significance  $\alpha = 0.05$ . Mean difference in the number of DAOH for the  
306 TRG arm and the CG arm is 21 days with a common standard deviation in each arm of 100. The  
307 Wilcoxon-Mann-Whitney test with the above assumptions and with a sample size of 400 evaluable  
308 subjects per study arm (a total of 800) yields 80% power to declare the observed difference as  
309 statistically significant. Accounting for a 5% loss to the follow-up, the total number increases to 842.

310

### 311 **Statistical Analyses**

#### 312 Primary Outcome

313 The primary analysis will be based on the percent of DAOH during the 12-24-month follow-  
314 up and analyzed using the Wilcoxon-Mann-Whitney test. DAOH is defined as the number days out of  
315 the first 365 days of follow-up that the patient was alive minus the total number of days the patient  
316 spent in the hospital (sum of days spent in the hospital for each hospitalization). Fractions of days  
317 spent in the hospital will be rounded up to full days. We plan to conduct two analyses, intent-to-treat  
318 (ITT) and modified intent-to-treat (MITT). The follow-up for ITT will start at randomization and  
319 extend for a minimum of about 14 months (9 week training period and 12 month follow-up) and a

320 maximum of 26 months (9 week training period plus 24 months of follow-up). For the MITT analysis,  
321 the follow-up will start at the end of the 9-week period.

322

### 323 Missing data

324 If a patient remained in the study for less than 365 days for reasons other than death, the  
325 following imputation methods will be applied:

- 326 1. Proportional Fraction. The proportion of DAOH will be calculated for the period the patient  
327 was on study and multiplied by 365;
- 328 2. Worst case scenario. Days not on study will be counted as NOT alive/out of hospital;
- 329 3. Best case scenario. Days not on study will be counted as alive and out of hospital.

330

### 331 Subgroup and Sensitivity Analyses

332 Subgroup analyses will be conducted to assess treatment heterogeneity by study site, age, sex,  
333 baseline NYHA class, peak VO<sub>2</sub> consumption and duration of follow-up. An additional sensitivity  
334 analysis will be conducted excluding patients from the control arm if they participated in a  
335 rehabilitation program.

### 336 Secondary Outcomes Assessed at 12 months.

337 The following time-to-event outcomes will be illustrated using Kaplan-Meier plots and  
338 compared between treatment arms using Cox proportional hazards regression with site and treatment  
339 arm as covariates: all-cause mortality, CV mortality, all-cause hospitalizations, CV hospitalizations,  
340 HF hospitalization, composite of all-cause mortality or all-cause hospitalization, composite of all-  
341 cause mortality or CV hospitalization, composite of all-cause mortality or HF hospitalization and  
342 composite of cardiovascular mortality or HF hospitalization. All available follow-up will be used with  
343 event rates estimated at 12 months.

### 344 Tertiary Outcomes Assessed at 9 weeks.

345 The following continuous outcomes will be compared between treatment arms using analysis  
346 of variance adjusting for baseline level of the outcome measure and site: change in CPET duration,

347 change in pVO<sub>2</sub> in CPET, change in pVO<sub>2</sub>%N in CPET, change in 6-MWT distance, change in QoL  
 348 measures with the SF-36 instrument as well as change in depression and anxiety scales. NYHA class  
 349 will be analyzed as ordinal variable using ordinal logistic regression including terms of baseline  
 350 NYHA class, site and treatment arm.  
 351 The summary is included in the **Table 7 and Table 8.**

352 **Table 7. TELEREH-HF Endpoints**  
 353

|                                                                                                                                                                                                                                                                                                                                                                                                                                                                                                                                                                                                                                                                                                                                                                                                                                      |
|--------------------------------------------------------------------------------------------------------------------------------------------------------------------------------------------------------------------------------------------------------------------------------------------------------------------------------------------------------------------------------------------------------------------------------------------------------------------------------------------------------------------------------------------------------------------------------------------------------------------------------------------------------------------------------------------------------------------------------------------------------------------------------------------------------------------------------------|
| <p><b>Primary end-point:</b></p> <p>The percent of number of days alive and out of hospital (DAOH) during the 12-24 months follow-up</p>                                                                                                                                                                                                                                                                                                                                                                                                                                                                                                                                                                                                                                                                                             |
| <p><b>Secondary end-points:</b></p> <p><b>Secondary outcomes assessed at 12-24 months:</b></p> <ul style="list-style-type: none"> <li>- all-cause and CV mortality</li> <li>- all-cause, CV and HF hospitalization</li> </ul> <p><b>Tertiary analysis - outcomes assessed at 9 weeks - the effectiveness of hybrid TR based on:</b></p> <ul style="list-style-type: none"> <li>- New York Heart Association class</li> <li>- cardiopulmonary exercise treadmill test duration</li> <li>- peak oxygen consumption (pVO<sub>2</sub>)</li> <li>- percentage of predicted peak oxygen consumption (pVO<sub>2</sub>%N)</li> <li>- six-minute walking test distance</li> <li>- quality of life assessment</li> <li>- depression assessment</li> <li>- anxiety assessment</li> <li>- acceptance of TR</li> <li>- adherence to TR</li> </ul> |
| <p><b>Composite end-points encompasses:</b></p> <ul style="list-style-type: none"> <li>- CV mortality and HF hospitalization</li> <li>- CV mortality and CV hospitalization</li> <li>- CV mortality and non CV hospitalization</li> <li>- all-cause mortality and CV hospitalization</li> <li>- all-cause mortality and non CV hospitalization</li> </ul>                                                                                                                                                                                                                                                                                                                                                                                                                                                                            |

354 TRG-telerehabilitation group, CG-control group, CV-cardiovascular, HF-heart failure, TR-telerehabilitation  
 355  
 356  
 357  
 358  
 359  
 360  
 361  
 362  
 363  
 364

365  
 366  
 367  
 368  
 369  
 370  
 371  
 372

**Table 8. Definitions of Outcomes**

|                                                                                                                                                                                                                                                                                                                                                                                                                                                                                                                                                                                                                                                                                                                                                                                                                                                                                                                                                                                                                                                                                                                                                                                                                                                                                                                                                                                                                                                                                                                                                                                                                                                                                                                                                                                                                                                                                                                                                                                                                                                                                                                                                                                                                                                                                                                                                                                                                                                                                                                                                                                                                                                                                                                                                                                                                                                                                       |
|---------------------------------------------------------------------------------------------------------------------------------------------------------------------------------------------------------------------------------------------------------------------------------------------------------------------------------------------------------------------------------------------------------------------------------------------------------------------------------------------------------------------------------------------------------------------------------------------------------------------------------------------------------------------------------------------------------------------------------------------------------------------------------------------------------------------------------------------------------------------------------------------------------------------------------------------------------------------------------------------------------------------------------------------------------------------------------------------------------------------------------------------------------------------------------------------------------------------------------------------------------------------------------------------------------------------------------------------------------------------------------------------------------------------------------------------------------------------------------------------------------------------------------------------------------------------------------------------------------------------------------------------------------------------------------------------------------------------------------------------------------------------------------------------------------------------------------------------------------------------------------------------------------------------------------------------------------------------------------------------------------------------------------------------------------------------------------------------------------------------------------------------------------------------------------------------------------------------------------------------------------------------------------------------------------------------------------------------------------------------------------------------------------------------------------------------------------------------------------------------------------------------------------------------------------------------------------------------------------------------------------------------------------------------------------------------------------------------------------------------------------------------------------------------------------------------------------------------------------------------------------------|
| <p><b>Hospitalization</b></p> <p>Regarding this trial, hospitalization is defined as hospital admission resulting in an overnight stay where the length of stay is at least 24 hours. In case of emergency room visits that include a date change with an unclear length of stay the (Clinical Endpoint Committee) CEC members are requested to discuss these events at a CEC meeting where the final classification (ambulatory visit versus hospital stay) will be made. All other events leading to an emergency room visit with a length of stay under 24 hours will be not classified as hospitalization.</p>                                                                                                                                                                                                                                                                                                                                                                                                                                                                                                                                                                                                                                                                                                                                                                                                                                                                                                                                                                                                                                                                                                                                                                                                                                                                                                                                                                                                                                                                                                                                                                                                                                                                                                                                                                                                                                                                                                                                                                                                                                                                                                                                                                                                                                                                    |
| <p><b>Primary reason of hospitalization</b></p> <p><b><i>I. Non-cardiovascular reason for hospitalization</i></b></p> <p>For a hospitalization considered as non-cardiovascular the admission reason should be clearly not associated with a deterioration of a cardiovascular condition. Examples are: admission due to a fall, back pain or others.</p> <p><b><i>II. Cardiovascular reason for hospitalization</i></b></p> <p>For a hospitalization considered as cardiovascular the admission reason should be clearly associated with a deterioration of a cardiovascular condition or need of intensified diagnostic procedures only feasible in a hospital. Examples could be: newly occurred or recurrent arrhythmia, acute coronary syndrome, myocardial infarction, worsening of heart failure, myocarditis, endocarditis, stroke or pulmonary infarction with the need for intensified diagnostic and therapy. The admission reason should be determined in the evaluation form. Hospitalisation for or with worsening heart failure</p> <p>1. A cardiovascular hospitalisation will be classified as ‘for or with worsening heart failure’ if the reason for admission is worsening heart failure. The CEC diagnosis will be made using the criteria described below, irrespective of the investigator and/or discharge diagnosis.</p> <p>The following two criteria must apply to adjudicate ‘worsening heart failure’:</p> <p>a. Presence of 2 typical heart failure signs or symptoms (including shortness of breath, dyspnoea on exertion, paroxysmal nocturnal dyspnoea, orthopnoea, bendopnea, fatigue, reduced exercise tolerance, pulmonary oedema, jugular vein distensions, pulmonary rales, S3 on cardiac auscultation, hepatojugular reflux, altered haemodynamics, peripheral oedema, and cardiomegaly).<br/>     OR objective evidence for worsening heart failure (as revealed by echocardiography, chest radiography or measurement of a natriuretic peptide) and an intensification of heart failure therapy).</p> <p>b. Treatment for heart failure started or intensified:</p> <p>To fulfil this criterion, the patient must have an initiation or intensification of therapy for heart failure, including at least one of the following:</p> <ul style="list-style-type: none"> <li>- Augmentation in oral diuretic therapy</li> <li>- Intravenous diuretic or vasoactive agent (e.g. inotrope, vasopressor or vasodilator)</li> <li>- Mechanical circulatory support or mechanical fluid removal</li> </ul> <p>For the avoidance of doubt, if the patient developed worsening heart failure during a hospitalisation (but heart failure was not the reason or a major component of the respective hospital admission), this will not be judged a 'Hospitalisation for or with worsening heart failure', but should be discussed in a CEC meeting.</p> |
| <p><b>Death</b></p> <p>For this trial, death is defined as death of any cause within a hospital or outside of a hospital. For secondary endpoint, the death will be distinguished in cardiovascular and non-cardiovascular death. If it is not possible to evaluate the cause of death, the CEC members are requested to discuss these</p>                                                                                                                                                                                                                                                                                                                                                                                                                                                                                                                                                                                                                                                                                                                                                                                                                                                                                                                                                                                                                                                                                                                                                                                                                                                                                                                                                                                                                                                                                                                                                                                                                                                                                                                                                                                                                                                                                                                                                                                                                                                                                                                                                                                                                                                                                                                                                                                                                                                                                                                                            |

events at a CEC meeting where the final classification will be made.

***I Cardiovascular death***

A death will be considered 'cardiovascular' when it is due to cardiovascular causes, which includes but is not limited to the following: deterioration of heart failure, acute myocardial infarction, arrhythmia, heart failure, pulmonary embolism, cerebrovascular disease (e.g. stroke), severe bleeding, endocarditis etc. The most applicable cause should be entered by the CEC-member in the evaluation form.

1. Death due to heart failure

Death resulting from mechanical dysfunction of the heart (even if the terminal event was likely an arrhythmia or sudden cardiac death) will be classified as heart failure death when preceded by persistent or frequently recurrent NYHA class IV symptoms, an escalating need for supportive therapy and often by evidence of organ failure (e.g.: renal). Subjects with cardiogenic shock or pulmonary oedema resistant to therapy are included in this category.

2. Sudden cardiac death

Sudden cardiac death is defined as natural death due to cardiac causes, preceded by abrupt loss of consciousness within one hour of the onset of acute symptoms; pre-existing heart disease may have been known to be present, but the time and mode of death are unexpected. Unwitnessed deaths equally will be considered as 'sudden cardiac death'.

As well as a patient was asymptomatic or without evidence of a deteriorating medical condition and seen alive within 24 hours prior to being found dead, this will be considered to be a 'sudden cardiac death'.

***II Non-cardiovascular death***

Death due to non-cardiovascular causes including, but not limited to the following: death from suicide, violence or accident; death from infection, but non-cardiovascular; death from renal failure, but non-cardiovascular; death from respiratory insufficiency, but non-cardiovascular; death from cancer; death from other non-cardiovascular cause.

***III Death from unknown causes***

This category applies to death with an unknown cause despite available data, and not attributable to any of the above categories. All attempts will be made to obtain adequate data for classification in an effort to minimize the number of subjects falling into this category.

***IV Death from unclassifiable cause due to lack of data***

This applies to death where review and classification is not possible because of lack of data. Such cases will be classified as 'Unknown'.

373

374

375           The TELEREH-HF trial will provide data on the effects of the novel model of HF patients  
376 management including hybrid comprehensive TR in terms of days alive and out of hospital,  
377 hospitalization and mortality rate. In addition, it will become a unique source of data on safety,  
378 effectiveness, QoL, depression, anxiety and patients' acceptance of and adherence to this intervention.

379

380 **Study Director - Ewa Piotrowicz, MD, PhD**

381 Telecardiology Center, Institute of Cardiology, Alpejska 42 , 04-628 Warszawa, Poland

382 tel. +48223434664, fax. +48223434519, e-mail: [epiotrowicz@ikard.pl](mailto:epiotrowicz@ikard.pl)

383 **Funding**

384 The study is supported by the National Centre for Research and Development, Warsaw, Poland (grant  
385 number STRATEGMED1/233547/13/NCBR/2015)

386 **References**

- 387 1. McMurray JJ, Adamopoulos S, Anker SD, et al. ESC guidelines for the diagnosis and  
388 treatment of acute and chronic heart failure 2012. *Eur Heart J* 2012; 33:1787–1869.
- 389 2. Fletcher GF, Ades PA, Kligfield P, et al. Exercise standards for testing and training: a  
390 scientific statement from the American Heart Association. *Circulation*. 2013;128(8):873-934.
- 391 3. Piepoli MF, Conraads V, Corra U, et al. Exercise training in heart failure: from theory to  
392 practice. A consensus document of the Heart Failure Association and the European  
393 Association for Cardiovascular Prevention and Rehabilitation. *Eur J Heart Fail* 2011;13:347–  
394 357.
- 395 4. Yancy CW, Jessup M, Bozkurt B, et al. American College of Cardiology Foundation;  
396 American Heart Association Task Force on Practice Guidelines. 2013 ACCF/AHA guideline  
397 for the management of heart failure: a report of the American College of Cardiology  
398 Foundation/American Heart Association Task Force on Practice Guidelines. *J Am Coll*  
399 *Cardiol*. 2013 Oct 15;62(16):e147-239.
- 400 5. Piepoli MF, Corrà U, Adamopoulos S et al. Secondary prevention in the clinical management  
401 of patients with cardiovascular diseases. Core components, standards and outcome measures  
402 for referral and delivery: a policy statement from the cardiac rehabilitation section of the  
403 European Association for Cardiovascular Prevention & Rehabilitation. Endorsed by the  
404 Committee for Practice Guidelines of the European Society of Cardiology. *Eur J Prev Cardiol*.  
405 2014;21(6):664-81.
- 406 6. Hamm LF, Sanderson BK, Ades PA, et al. Core competencies for cardiac  
407 rehabilitation/secondary prevention professionals: 2010 update: position statement of the  
408 American Association of Cardiovascular and Pulmonary Rehabilitation. *J Cardiopulm Rehabil*  
409 *Prev*. 2011;31(1):2-10.
- 410 7. Bjarnason-Wehrens B, McGee H, Zwisler AD, et al. Cardiac rehabilitation in Europe:  
411 Results from the European Cardiac Rehabilitation Inventory Survey. *Eur*  
412 *J Cardiovasc Prev Rehabil* 2010; 17: 410–418.
- 413 8. Czech M, Opolski G, Zdrojewski T. et al. The costs of heart failure in Poland from the public  
414 payer's perspective. Polish programme assessing diagnostic procedures, treatment and costs in  
415 patients with heart failure in randomly selected outpatient clinics and hospitals at different  
416 levels of care: POLKARD. *Kardiol Pol*. 2013;71(3):224-32
- 417 9. PA Harris, R Taylor, R Thielke, J Payne, N Gonzalez, JG. Conde. Research electronic data  
418 capture (REDCap) – A metadata-driven methodology and workflow process for providing  
419 translational research informatics support, *J Biomed Inform*. 2009 Apr;42(2):377-81.
- 420 10. Piotrowicz E. How to do: telerehabilitation in heart failure patients. *Cardiol J*. 2012;19(3):243-  
421 8.
- 422 11. Piotrowicz E, Baranowski R, Bilinska M, et al. A new model of home-based telemonitored  
423 cardiac rehabilitation in patients with heart failure: effectiveness, quality of life, and  
424 adherence. *Eur J Heart Fail*. 2010;12(2):164-71.
- 425 12. Piotrowicz E, Korzeniowska-Kubacka I, Chrapowicka A, et al. Feasibility of home-based  
426 cardiac telerehabilitation: Results of TeleInterMed study. *Cardiol J* 2014;21,5:539-546
- 427 13. Conraads VM, Deaton C, Piotrowicz E. Santaularia N, Tierney S, Piepoli MF, Pieske B,  
428 Schmid JP, Dickstein K, Ponikowski PP, Jaarsma T. Adherence of heart failure patients to  
429 exercise: barriers and possible solutions: a position statement of the Study Group on Exercise  
430 Training in Heart Failure of the Heart Failure Association of the European Society of  
431 Cardiology. *Eur J Heart Fail*. 2012;14(5):451-8.
