# Supplementary material
Source: PubMed Central journal article supplement (PMC6865325)
Supplement: jamacardiol-5-300-s004.pdf [file jamacardiol-5-300-s004.pdf]

**Piotrowicz. Effects of a 9-week hybrid comprehensive telerehabilitation program on long-term outcomes in patients with heart failure: the multi-center, prospective, open-label, parallel group, Telerehabilitation in Heart Failure Patients (TELEREF-HF) randomized clinical trial. *JAMA Cardiol.* Published online November 17, 2019. doi:10.1001/jamacardio.2019.5006**

## **Data Sharing Statement**

### **Data**

**Data available:** Yes

**Data types:** Other (please specify)

**Additional Information:** Individual proposal will be evaluated by Steering Committee of the trial.

**How to access data:** Individual proposal will be evaluated by Steering Committee of the trial. email [rpiotrowicz@ikard.pl](mailto:rpiotrowicz@ikard.pl)

**When available:** With publication

### **Supporting Documents**

**Document types:** None

### **Additional Information**

**Who can access the data:** Researchers whose proposed use of the data has been approved)

**Types of analyses:** Individual proposal will be evaluated by Steering Committee of the trial.

**Mechanisms of data availability:** After approval of a proposal
